# Supplementary material for: Work stress, work motivation and their effects on job satisfaction in community health workers: a cross-sectional survey in China
Source: PubMed Central journal article supplement (PMC4054641; doi:10.1136/bmjopen-2014-004897), 2014-06-05
Supplement: bmjopen-2014-004897.draft_revisions.pdf [file bmjopen-2014-004897.draft_revisions.pdf]

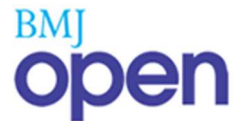

**Work stress, work motivation and their effects on job satisfaction for community health workers in China**

|                                 |                                                                                                                                                                                                                                                                                                                                                                                                                                                                                                                                                                                                                                                                                                                                                                                                                                                                                                    |
|---------------------------------|----------------------------------------------------------------------------------------------------------------------------------------------------------------------------------------------------------------------------------------------------------------------------------------------------------------------------------------------------------------------------------------------------------------------------------------------------------------------------------------------------------------------------------------------------------------------------------------------------------------------------------------------------------------------------------------------------------------------------------------------------------------------------------------------------------------------------------------------------------------------------------------------------|
| Journal:                        | <i>BMJ Open</i>                                                                                                                                                                                                                                                                                                                                                                                                                                                                                                                                                                                                                                                                                                                                                                                                                                                                                    |
| Manuscript ID:                  | bmjopen-2014-004897                                                                                                                                                                                                                                                                                                                                                                                                                                                                                                                                                                                                                                                                                                                                                                                                                                                                                |
| Article Type:                   | Research                                                                                                                                                                                                                                                                                                                                                                                                                                                                                                                                                                                                                                                                                                                                                                                                                                                                                           |
| Date Submitted by the Author:   | 21-Jan-2014                                                                                                                                                                                                                                                                                                                                                                                                                                                                                                                                                                                                                                                                                                                                                                                                                                                                                        |
| Complete List of Authors:       | Li, Li; School of Public Health, Harbin Medical University, Department of Health Management<br>Zhou, Hao; Center for Disease Control and Prevention, Department of Emergency<br>Hu, Hongyan; The Second Affiliated Hospital, Harbin Medical University, Research Service Office<br>He, Changzhi; School of Public Health, Harbin Medical University, Department of Health Management<br>Fan, Lihua; School of Public Health, Harbin Medical University, Department of Health Management<br>Liu, Xinyan; School of Public Health, Harbin Medical University, Department of Health Management<br>Zhang, Zhong; School of Public Health, Harbin Medical University, Department of Health Management<br>Li, Heng; School of Public Health, Harbin Medical University, Department of Health Management<br>Sun, Tao; School of Public Health, Harbin Medical University, Department of Health Management |
| <b>Primary Subject Heading</b>: | Health services research                                                                                                                                                                                                                                                                                                                                                                                                                                                                                                                                                                                                                                                                                                                                                                                                                                                                           |
| Secondary Subject Heading:      | Public health                                                                                                                                                                                                                                                                                                                                                                                                                                                                                                                                                                                                                                                                                                                                                                                                                                                                                      |
| Keywords:                       | Human resource management < HEALTH SERVICES ADMINISTRATION & MANAGEMENT, Organisational development < HEALTH SERVICES ADMINISTRATION & MANAGEMENT, Organisation of health services < HEALTH SERVICES ADMINISTRATION & MANAGEMENT                                                                                                                                                                                                                                                                                                                                                                                                                                                                                                                                                                                                                                                                   |
|                                 |                                                                                                                                                                                                                                                                                                                                                                                                                                                                                                                                                                                                                                                                                                                                                                                                                                                                                                    |

SCHOLARONE™  
Manuscripts

1  
2  
3  
4  
5  
6  
7  
8  
9  
10  
11  
12  
13  
14  
15  
16  
17  
18  
19  
20  
21  
22  
23  
24  
25  
26  
27  
28  
29  
30  
31  
32  
33  
34  
35  
36  
37  
38  
39  
40  
41  
42  
43  
44  
45  
46  
47  
48  
49  
50  
51  
52  
53  
54  
55  
56  
57  
58  
59  
60

## Work stress, work motivation and their effects on job satisfaction for community health workers in China

Li Li\*<sup>1</sup>, Hao Zhou<sup>2</sup>, Hongyan Hu<sup>3</sup>, Changzhi He<sup>1</sup>, Lihua Fan<sup>1</sup>, Xinyan Liu<sup>1</sup>, Zhong Zhang, Heng Li<sup>1</sup>, Tao Sun<sup>1</sup>

<sup>1</sup> Department of Health Management, School of Public Health, Harbin Medical University, Harbin, China

<sup>2</sup> Department of Emergency, Center for Disease Control and Prevention, Harbin, China

<sup>3</sup> Research Service Office, The Second Affiliated Hospital, Harbin Medical University, Harbin, China

**Correspondence to** Li Li: [lilihmu@gmail.com](mailto:lilihmu@gmail.com)

### Abstract

**Objective:** It has been well documented that both work stress and work motivation are key determinants of job satisfaction. The aim of this study is to examine the level of work stress and work motivation and their contribution to job satisfaction among community health workers in Heilongjiang Province, China.

**Methods:** A cross-sectional survey of 930 community health workers from six cities in Heilongjiang province, China, was conducted from

1  
2  
3  
4  
5  
6  
7  
8  
9  
10  
11  
12  
13  
14  
15  
16  
17  
18  
19  
20  
21  
22  
23  
24  
25  
26  
27  
28  
29  
30  
31  
32  
33  
34  
35  
36  
37  
38  
39  
40  
41  
42  
43  
44  
45  
46  
47  
48  
49  
50  
51  
52  
53  
54  
55  
56  
57  
58  
59  
60

October 01, 2012 to December 31, 2012. Multi-stage sampling procedures were used to measure socio-economic and demographic status, work stress, work motivation and job satisfaction. Logistic regression analysis was performed to assess key determinants of job satisfaction.

**Results:** There were significant differences in some subscales of work stress and work motivation by some of socio-economic characteristics. Dissatisfied respondents had significant higher levels in overall perception and five subscales of work stress than satisfied workers. However, satisfied respondents had higher levels in overall perception and five subscales of work motivation than dissatisfied respondents, with the exception of finance motivation. The main determinants of job satisfaction were occupation; age; title; income; the career development and wages & benefits subscales of work stress; and the recognition, responsibility and finance subscales of work motivation.

**Conclusion:** The finding of this study suggested that there is considerable room for improvement in job satisfaction among community health workers of Heilongjiang Province in China. Health care managers should take both work stress and work motivation into consideration, since two subscales of work stress and one subscale of work motivation negatively influenced job satisfaction and two subscales of work motivation positively influence job satisfaction.

### **Article summary**

### Article focus

- What is the mean value of overall perception and subscales of work stress and work motivation in respect to the level of job satisfaction?
- What is facet score of work stress and work motivation by socio-economic and demographic status?
- How can work stress and work motivation influence job satisfaction among community health workers?

### Key message

There is considerable room for improvement in job satisfaction among community health workers and health care managers should take both work stress and work motivation into consideration.

### Strength and limitations of this study

This study is one of the first of its kind to examine the combined effects of work stress and work motivation on job satisfaction among urban community workers in China since the implementation of new health system reform. The instrument used in this study was not an international commonly scale and the survey was conduct by self-administrated method.

### Introduction

In 2009, the Chinese central government promulgated a new health system reform plan and called for the development of community health service. As the foundation of the three-tier health system in China,

1  
2  
3  
4 CHCs played a very important role in improving access to health care  
5 service, enhancing equity and reducing hospitalization and costs.<sup>1-2</sup>  
6  
7

8  
9 From 2009 to 2012, the number of community health institutions  
10 increased 6254 and the number of visits in them increased 193.949  
11 million person-times. So, community health centers and workers  
12 thereof, are very important in the process of health system reform.  
13  
14  
15  
16  
17

18  
19 Heilongjiang Province is located in Northeast China with population  
20 of about 38.1 million. There are 776 urban community health  
21 institutions with 13100 health workers as of December 31, 2012.<sup>3</sup>  
22  
23 However, limited resources, shortage of skilled health workers  
24 constituted a very important bottleneck to service and many of  
25 community health workers experienced work related stress and had low  
26 motivation.<sup>4-5</sup> Lots of research has shown that work stress and work  
27 motivation can greatly affect the workers' job satisfaction and in turn the  
28 quality and delivery of health care. While, few studies have specifically  
29 evaluated the level of work stress and motivation and their effects on job  
30 satisfaction among Chinese community health workers after the  
31 implementation of the new health system reform policy.  
32  
33  
34  
35  
36  
37  
38  
39  
40  
41  
42  
43  
44  
45  
46  
47

48  
49 Work stress can be defined as the harmful physical and emotional  
50 responses that occur when job requirements do not match the worker's  
51 capabilities, resources, and needs of the workers and Cooper believed that  
52 stress resulted from a misfit between individuals and their environment.  
53  
54  
55  
56  
57  
58  
59  
60

1  
2  
3  
4  
5  
6  
7  
8  
9  
10  
11  
12  
13  
14  
15  
16  
17  
18  
19  
20  
21  
22  
23  
24  
25  
26  
27  
28  
29  
30  
31  
32  
33  
34  
35  
36  
37  
38  
39  
40  
41  
42  
43  
44  
45  
46  
47  
48  
49  
50  
51  
52  
53  
54  
55  
56  
57  
58  
59  
60

<sup>6-7</sup> A survey conducted by international survey research of Chicago reported that forty percent of these peoples said they had too much pressure at work.<sup>8</sup> Kazufumi, et al identified major work stress factors in an organization.<sup>9-11</sup> Lots of research has been conducted on the relationship between work stress and job satisfaction and found kinds of work related stress lead to job dissatisfaction.<sup>10,12-15</sup>

Work motivation can be defined as an individual's degree of willingness to exert and maintain an effort towards attaining organizational goals and Nahavandi and Malekzadeh believed that motivation was a driver of stable mind, aspiration or interest within the individual that can translate into action.<sup>16-18</sup> It can be inferred from these definitions that to motivate workers is to stimulate them or cause them to desire to do something. Patrick and Wilbroad developed a tool to measure health worker motivation and revealed the major determinants of higher motivation.<sup>19-20</sup> Tribolet explored the relationship between intrinsic and extrinsic motivation.<sup>21</sup> Pool found significant positive association between work motivation and job satisfaction, whereas Stringer revealed that intrinsic motivation was positively associated with job satisfaction and extrinsic motivation was negatively associated with job satisfaction.<sup>22-23</sup>

In China, Ge (2011) analyzed the relationship between work stress and job satisfaction among Chinese community health workers and

1  
2  
3 identified key predictors of job satisfaction.<sup>24</sup> Chen (2012) investigated  
4 the relationship between work motivation, work stress and job  
5 satisfaction toward cross-strait employees in Taiwan and mainland  
6 China.<sup>25</sup>  
7  
8  
9  
10

11  
12  
13  
14 This study focused on the major factors of work stress and  
15 motivation demonstrated in research findings and provided an overview  
16 from community health workers' perspective of work stress and  
17 motivation factors.<sup>11, 26-28</sup> The purpose of this study was to assess the  
18 determinants of job satisfaction among community health workers in one  
19 Chinese province. A cross-sectional survey was conducted to measure the  
20 level work stress, work motivation and job satisfaction. The key  
21 determinants of job satisfaction for community health workers were  
22 assessed with special attention devoted to work stress and work  
23 motivation.  
24  
25  
26  
27  
28  
29  
30  
31  
32  
33  
34  
35  
36  
37  
38

## 39 **Design and methods**

### 40 **Samples**

41  
42 A cross-sectional survey was conducted aiming at community health  
43 workers during March 1st and October 31, 2013 in Heilongjiang Province,  
44 China. A multi-stage, stratified sampling design was employed to ensure  
45 study data were provincially representative. First, 6 cities (Harbin,  
46 Qiqihar, Suihua, Jiamusi, Qitaihe, Heihe) were selected based on GDP  
47 figures in three levels. Second, 15 community health centers were  
48  
49  
50  
51  
52  
53  
54  
55  
56  
57  
58  
59  
60

1  
2  
3 randomly selected from each city. The research team visited the selected  
4  
5  
6 community health centers and invited all general practitioners, public  
7  
8 health physician, nurses and other health technical staff to participate in  
9  
10 the study with the exception of those who were sick and absent. The  
11  
12 survey questionnaires were completed by respondents themselves in order  
13  
14 to ensure confidentiality. The research staff stayed in a room of the  
15  
16 community health center for a whole day and was available to answer any  
17  
18 respondents' questions. Therefore, respondents can choose their  
19  
20 appreciate time to complete the questionnaire (such as, when they were  
21  
22 not busy or their office was quiet). Finally, 980 community health  
23  
24 workers participated in the survey and the self-administrative  
25  
26 questionnaire was completed by all study subjects, yielding a response  
27  
28 rate of 100%. In total, there were 930 respondents but of 50 (5.1%)  
29  
30 were incomplete. This study was approved by Medical Ethic Committee  
31  
32 of Harbin Medical University.  
33  
34  
35  
36  
37  
38  
39  
40  
41  
42  
43

#### 44 **Assessment tools**

45  
46 The study instrument was a self-administered questionnaire and was  
47  
48 composed of 4 sections. Section 1 focused on the socio-economic and  
49  
50 demographic status of respondents.  
51  
52

53  
54 Section 2 was used to assess the value of work stress with a 30-item  
55  
56 instrument developed through qualitative intensive interviews with health  
57  
58  
59  
60



1  
2  
3  
4 care managers and community health workers, review of literatures and  
5  
6 an initial pilot study.<sup>11,26</sup> These items were divided into five subscales by  
7  
8 factor analysis, which didn't be discussed here. These five subscales of  
9  
10 work stress were named as work task & role stress, career development  
11  
12 stress, wages & benefits stress, working relationship stress, and  
13  
14 organizational structure & climate stress respectively. Respondents were  
15  
16 asked to rate their perception of work stress on each item based on a  
17  
18 5-point Likert scale, very less stressful (1), less stressful (2), average (3),  
19  
20 stressful (4) and very stressful (5). The Cronbach's alpha value for this  
21  
22 study was 0.87.  
23  
24  
25  
26  
27

28  
29 Section 3 was used to assess work motivation. The four subscales of  
30  
31 work motivation, as captured in previous research and identified by factor  
32  
33 analysis (factor analysis didn't be discussed here), were career  
34  
35 development motivation, recognition motivation, responsibility  
36  
37 motivation and finance motivation.<sup>27-29</sup> In this study, we referred to career  
38  
39 development motivation and finance motivation as extrinsic motivation,  
40  
41 and recognition motivation and responsibility motivation as intrinsic  
42  
43 motivation.<sup>23,28</sup> Respondents were asked to rate their motivation intensity  
44  
45 on each item based on a 5-point Likert scale, very less strong (1), less  
46  
47 strong (2), average (3), strong (4) and very strong (5). The Cronbach's  
48  
49 alpha value for this study was 0.75.  
50  
51  
52  
53  
54  
55

56 Section 4 was used to assess job satisfaction. In this study, a  
57  
58  
59  
60

1  
2  
3 single-item measure was adopted in measuring overall job satisfaction.<sup>30</sup>

4  
5  
6 The respondents were asked to indicate their level of job satisfaction on a  
7  
8 4-point Likert scale, strongly dissatisfied (1), dissatisfied (2), satisfied (3)  
9  
10 and dissatisfied (4).  
11

### 12 13 **Data analysis**

14  
15  
16 Survey results were analyzed using SPSS 17.0. Descriptive analyses  
17  
18 included frequencies and percentages for categorical variables, means and  
19  
20 standard deviations (SDs) for continuous variables. Mean differences  
21  
22 were examined using t-test and ANOVA for relevant subgroups. And,  
23  
24 logistic regression was used to measure key determinants of job  
25  
26 satisfaction.  
27  
28  
29

### 30 31 **Results**

#### 32 33 **Socio-economic and demographic status of respondents**

34  
35  
36 Socio-economic and demographic status of the sample were shown in  
37  
38 Table 1. A majority of the participants were female (74.6%). General  
39  
40 practitioners accounted for 36% of community health workers surveyed,  
41  
42 followed by nurses (28.8%), public health physician (19.1%). In this  
43  
44 survey, only 18.6% of them had senior professional titles and less than  
45  
46 half (40.2%) of them had bachelor degree or higher. Only 19.6% of them  
47  
48 had monthly incomes of more than 3,000 RMB (where  
49  
50 \$1.00US=6.23RMB in 2012). Nearly ninety percent of respondents  
51  
52 worked more than 40 hours per week.  
53  
54  
55  
56  
57  
58  
59  
60

### **Facet scores of work stress and work motivation by socio-economic and demographic status**

Results of variance analysis and further multiple comparison t-test were showed in Table 1. It indicated that there was significant difference in all of the five subscales of work stress by occupation ( $p<0.01$ ) and sex ( $p<0.05$ ), with general practitioners and male having higher levels of work stress. The wages & benefits subscale of work stress showed significant difference by educational background ( $p<0.05$ ) and income ( $p<0.05$ ). Respondents with middle professional title had significant higher level of stress in work task & role subscale ( $p< 0.01$ ) and in relationship subscribe ( $p<0.05$ ). Those who were aged 35-44 and 45-54 years had significant higher level of stress in task & role subscale ( $p< 0.01$ ).

There was no significant difference in all of the four subscales of work motivation by educational background, professional title and income. The male had significant higher level recognition and financial motivation ( $p<0.05$ ). Younger workers ( $<25$ ) had significantly higher level of recognition motivation ( $p<0.05$ ) and responsibility motivation ( $p<0.05$ ). A higher level of recognition motivation was expressed by general practitioners ( $p<0.05$ ).

### **Level of work stress and work motivation in respect to the level of job satisfaction**

1  
2  
3  
4 Table 2 revealed mean score of overall perception of work stress was  
5  
6 3.11, which was only above the mid-point of 3. Wages & benefits (3.60)  
7  
8 subscale of work stress ranked in the highest position, followed by work  
9  
10 task & role (3.31), career development (2.96), organizational structure &  
11  
12 climate (2.90) and relationship (2.75) subscales of work stress. (F=154.9,  
13  
14 p<0.001). Statistically significant differences were noted in overall  
15  
16 perception and the five subscales of work stress between the satisfied and  
17  
18 dissatisfied groups of respondents, with those who were dissatisfied  
19  
20 having higher levels of work stress (p<0.001).  
21  
22  
23  
24

25  
26 Career development motivation was rated the highest level, followed  
27  
28 by financial, recognition and responsibility motivation (F=202.6 ,  
29  
30 p<0.001). Levels of overall perception of work motivation and all  
31  
32 subscales with the exception of financial motivation were significantly  
33  
34 different between the satisfied and dissatisfied groups of respondents, and  
35  
36 the satisfied workers had higher levels of work motivation (p<0.01).  
37  
38  
39  
40

### 41 **Determinants of job satisfaction**

42

43  
44 In our study, 61.3% of respondents were satisfied with job. Table 3  
45  
46 presented results from logistic regression model that examined key  
47  
48 determinants of job satisfaction with the special attention devoted to work  
49  
50 stress and work motivation.  
51  
52

53  
54 Results demonstrated that only a few demographic characteristics were  
55  
56 determinants of job satisfaction. And we found that when career  
57  
58  
59  
60

1  
2  
3  
4  
5  
6  
7  
8  
9  
10  
11  
12  
13  
14  
15  
16  
17  
18  
19  
20  
21  
22  
23  
24  
25  
26  
27  
28  
29  
30  
31  
32  
33  
34  
35  
36  
37  
38  
39  
40  
41  
42  
43  
44  
45  
46  
47  
48  
49  
50  
51  
52  
53  
54  
55  
56  
57  
58  
59  
60

development and wages & benefits subscales of work stress increased one grade, job satisfaction decreased 32% [odds ratio (OR) =0.68,  $p<0.05$ ] and 37% (OR= 0.63,  $p<0.01$ ) respectively. When finance motivation increased one grade, job satisfaction would decrease 28% (OR=0.72,  $p<0.01$ ). Whereas, when recognition motivation and responsibility motivation increased one grade, job satisfaction would increase 1.86 timeshare (OR=2.86,  $p<0.01$ ) and 0.36 times (OR=1.36,  $p<0.05$ ) respectively. Compared with nurses, general practitioners (OR=0.56,  $p<0.01$ ) and public health physician (OR=0.42,  $p<0.05$ ) had lower job satisfaction, while other technical staff (OR=1.89) had higher level of job satisfaction. Workers with no title (OR=7.02,  $p<0.05$ ) were more satisfied than workers with senior title.

## Discussion

This study was one of the first of its kind to examine the level of work stress and work motivation and their combined effects on job satisfaction among urban community workers in China since the implementation of new health system reform. These findings have significant implications for managers in their efforts to improve workers' job satisfaction.

First, managers should pay more attention to reduce workers work stress. Many of previous research have focused on the relationship between overall work stress and job satisfaction, while this study examined the level of five subscales of work stress and their effects on

1  
2  
3  
4 job satisfaction.<sup>31-32</sup> The results indicated that mean scores of the five  
5  
6 subscales of work stress in dissatisfied respondents were significant  
7  
8 higher than those in satisfied respondents. And the career development  
9  
10 and wages & benefits subscales of work stress were negatively related  
11  
12 with job satisfaction. The findings were consistent with previous studies  
13  
14 that workers were likely to report low job satisfaction if they did not  
15  
16 receive promotion and advancement opportunities and did not get  
17  
18 adequate salary.<sup>33-34</sup> But this was different from some other studies.  
19  
20 McGown found interpersonal relationships were major stressors reported  
21  
22 by workers, and Lee and Callaghan found work overload was the  
23  
24 commonest faced by most nurses.<sup>35-37</sup> It should be concerned that in this  
25  
26 study these two negative determinants of job satisfaction were ranked  
27  
28 first and third highest level among five subscales respectively.  
29  
30  
31  
32  
33  
34  
35

36  
37 Second, managers should take measures to inspire workers intrinsic  
38  
39 motivation. In this study, we referred to career development and finance  
40  
41 motivation as extrinsic motivation, while recognition and responsibility  
42  
43 motivation as intrinsic motivation based on literatures.<sup>23,38</sup> We found that  
44  
45 the recognition and responsibility subscales of work motivation were  
46  
47 positive determinants of job satisfaction and finance motivation was  
48  
49 negative determinant. This was consistent with Becchetti's argument  
50  
51 that when workers don't work for financial incentive, they may seek  
52  
53 satisfaction irrespectively of the level of pay, even if the financial  
54  
55  
56  
57  
58  
59  
60

1  
2  
3  
4 incentive is kept to a minimum, workers may be satisfied with their job.<sup>38</sup>  
5  
6 The “crowding-in” effect also formulated that the intrinsic motivation  
7  
8 increases job satisfaction, whereas extrinsic motivation decreases job  
9  
10 satisfaction (Frey, 1997).<sup>39</sup> It should be noted that in this study the level  
11  
12 of extrinsic motivation was higher than intrinsic motivation.<sup>40</sup> This  
13  
14 finding was consistent with Dermer’s study, whereas contrary to  
15  
16 Tribolet’s study.<sup>41, 21</sup>  
17  
18  
19

20  
21 Several reasons might have contributed to these above findings. In  
22  
23 Heilongjiang Province the average income of health service persons in  
24  
25 urban units was 52,564 RMB (where \$1.00US=6.23RMB in 2012) as of  
26  
27 2012. But in this study 80.4% of respondents’ yearly income was less  
28  
29 than 36,000 RMB. The poor salary increased their wages & benefits  
30  
31 stress and finance motivation.<sup>42</sup> In the meanwhile, it was difficult for  
32  
33 community health workers to get title promotion, for there were limit  
34  
35 promotion quotas for CHCs every year in Heilongjiang Province and our  
36  
37 study found only 18.6% of respondents had senior professional title.  
38  
39  
40  
41  
42

43  
44 As some subscales of work stress and work motivation can positively  
45  
46 or negatively influence job satisfaction, we examined the different level  
47  
48 of work stress and work motivation by demographic characteristics and  
49  
50 found that managers should pay more attention to three kinds of workers.  
51  
52 The first group workers were those aged 35-44 and 45- 54 years, who had  
53  
54 higher level of stress in work task & role subscale and lower level of  
55  
56  
57  
58  
59  
60

1  
2  
3  
4 intrinsic motivation. Similar results have been reported in Uganda, where  
5  
6 the middle age groups was significantly more stressed than the youngest  
7  
8 age group.<sup>15</sup> This could be related to workload, difficulties and  
9  
10 complexity of the duties, which was usually more for 35-54 years age  
11  
12 workers as they were the backbone of community health service. The  
13  
14 second group was males. In our study, mean scores of all work stress  
15  
16 subscales for males tended to be higher than that for females. Consistent  
17  
18 with Malik's study, males had higher level in finance motivation.<sup>43</sup> But a  
19  
20 British study of general practitioners indicated no differences in stress  
21  
22 rates between males and females and David found female has more stress  
23  
24 in financial rewards and role ambiguity.<sup>44-45</sup> The third group workers  
25  
26 were general practitioners, who experienced highest stress in all of the  
27  
28 five subscales and had highest career development motivation. In  
29  
30 community health centers, general practitioners faced more difficult and  
31  
32 complicated tasks and kinds of medical risks than others, and they had  
33  
34 lower income and less promotion opportunities than those physicians in  
35  
36 general hospitals.

### 37 38 39 40 41 42 43 44 45 46 **Limitations of this study**

47  
48 The findings in this study need to be viewed in light of three key  
49  
50 limitations. First, the instrument for assess the work stress and work  
51  
52 motivation was developed from earlier study and discussed with experts,  
53  
54 while not an international commonly scale. Second, we used a  
55  
56  
57  
58  
59  
60



1  
2  
3  
4 cross-sectional survey, which may limit our ability to identify causal  
5  
6 relationships between work stress and motivation and job satisfaction.  
7  
8  
9 Third, the measurements were conducted by self-administrated method  
10  
11 and respondents' cognition can be affected by emotions at that point in  
12  
13 time. So the common method bias and self-administrated bias might  
14  
15 affect the results.  
16  
17

### 18 **Conclusion**

19  
20 It is important for health-care managers to improve job satisfaction of  
21  
22 health workers in low-resource settings. In this study, we  
23  
24 comprehensively examined the level of work stress and work motivation  
25  
26 by demographic characteristics and in respect to the level of job  
27  
28 satisfaction, and additionally, the key determinants of job satisfaction  
29  
30 were assessed using logistic regression analysis. The results indicated that  
31  
32 community health workers rated wages & benefits highest among five  
33  
34 subscales of work stress and workers extrinsic motivation were higher  
35  
36 than intrinsic motivation. The career development and wages & benefits  
37  
38 subscales of work stress and finance motivation were significant negative  
39  
40 determinants of job satisfaction, whereas the recognition and  
41  
42 responsibility subscales of motivation were significant positive  
43  
44 determinants.  
45  
46  
47  
48  
49  
50  
51  
52

53  
54 The study findings suggested that there is considerable room for  
55  
56 improvement in job satisfaction in community health workers of  
57  
58  
59  
60

Heilongjiang Province in China and health care managers should take both work stress and work motivation into consideration. First they should pay more attention to three kinds of workers as they had higher work stress and extrinsic motivation. Second they should take a variety of measures to reduce career development and wages & benefits stress, as they were negative determinants of job satisfaction. Third, it is important for managers to inspire workers intrinsic motivation as it can positively influence job satisfaction.

**Table 1 Facets of work stress and work motivation by socio-economic and demographic status for respondents**

|                               |     |      | Work stress      |                    |                  |              |                                    | Work motivation |  |
|-------------------------------|-----|------|------------------|--------------------|------------------|--------------|------------------------------------|-----------------|--|
|                               | N   | %    | work task & role | career development | wages & benefits | relationship | organizational structure & climate | recognition     |  |
| <b>Occupation</b>             |     |      |                  |                    |                  |              |                                    |                 |  |
| General practitioner          | 335 | 36.0 | 3.53             | 3.17               | 3.78             | 2.90         | 3.14                               | 3.61            |  |
| Public health physician       | 178 | 19.1 | 3.20             | 2.89               | 3.70             | 2.63         | 2.96                               | 3.57            |  |
| Nurse                         | 267 | 28.8 | 3.24             | 2.95               | 3.54             | 2.76         | 2.78                               | 3.53            |  |
| Other                         | 150 | 16.1 | 3.09             | 2.79               | 3.45             | 2.65         | 2.84                               | 3.59            |  |
| F                             |     |      | 6.91**           | 4.97**             | 3.45**           | 3.05**       | 6.25**                             | 0.66            |  |
| <b>Sex</b>                    |     |      |                  |                    |                  |              |                                    |                 |  |
| Male                          | 236 | 25.4 | 3.44             | 3.10               | 3.77             | 2.88         | 3.12                               | 3.71            |  |
| Female                        | 694 | 74.6 | 3.27             | 2.93               | 3.56             | 2.72         | 2.85                               | 3.56            |  |
| F                             |     |      | 2.50*            | 2.27*              | 2.60*            | 2.51*        | 4.09*                              | 2.36*           |  |
| <b>Educational background</b> |     |      |                  |                    |                  |              |                                    |                 |  |
| High school or below          | 110 | 11.8 | 3.18             | 2.90               | 3.36             | 2.81         | 2.72                               | 3.57            |  |
| Junior college                | 446 | 48.0 | 3.28             | 2.94               | 3.61             | 2.74         | 2.86                               | 3.57            |  |
| College and above             | 374 | 40.2 | 3.36             | 3.00               | 3.65             | 2.73         | 3.16                               | 3.60            |  |
| F                             |     |      | 2.30             | 0.66               | 4.21*            | 0.45         | 4.02*                              | 0.13            |  |
| <b>Age in years</b>           |     |      |                  |                    |                  |              |                                    |                 |  |
| <25                           | 78  | 8.4  | 3.08             | 2.81               | 3.45             | 2.60         | 2.77                               | 3.80            |  |
| 25-34                         | 258 | 27.7 | 3.21             | 2.94               | 3.63             | 2.72         | 2.91                               | 3.65            |  |
| 35-44                         | 329 | 35.4 | 3.36             | 2.98               | 3.55             | 2.78         | 2.88                               | 3.52            |  |
| 45-54                         | 234 | 25.2 | 3.43             | 3.02               | 3.69             | 2.79         | 2.94                               | 3.53            |  |
| ≥55                           | 31  | 3.3  | 3.12             | 2.88               | 3.54             | 2.71         | 2.93                               | 3.48            |  |

|                                 |     |      |        |      |       |       |       |       |
|---------------------------------|-----|------|--------|------|-------|-------|-------|-------|
| <b>F</b>                        |     |      | 4.71** | 1.01 | 1.36  | 1.12  | 0.83  | 2.89* |
| <b>Title</b>                    |     |      |        |      |       |       |       |       |
| <b>Senior title</b>             | 42  | 4.5  | 3.12   | 3.11 | 3.38  | 2.69  | 2.73  | 3.37  |
| <b>Vice-senior title</b>        | 131 | 14.1 | 3.32   | 2.92 | 3.65  | 2.63  | 2.93  | 3.46  |
| <b>Middle title</b>             | 399 | 42.9 | 3.43   | 3.03 | 3.69  | 2.85  | 2.94  | 3.56  |
| <b>Primary title</b>            | 299 | 32.2 | 3.20   | 2.93 | 3.54  | 2.72  | 2.87  | 3.62  |
| <b>No title</b>                 | 59  | 6.3  | 3.23   | 2.86 | 3.48  | 2.58  | 2.89  | 3.73  |
| <b>F</b>                        |     |      | 3.96** | 1.07 | 1.71  | 3.04* | 0.59  | 1.73  |
| <b>Monthly income (RMB)</b>     |     |      |        |      |       |       |       |       |
| <b>&lt;2000</b>                 | 361 | 38.9 | 3.24   | 2.95 | 3.69  | 2.76  | 2.90  | 3.61  |
| <b>2000-2999</b>                | 386 | 41.5 | 3.32   | 2.96 | 3.61  | 2.75  | 2.88  | 3.59  |
| <b>3000-3999</b>                | 139 | 14.9 | 3.43   | 2.97 | 3.44  | 2.68  | 2.96  | 3.52  |
| <b>≥4000</b>                    | 44  | 4.7  | 3.39   | 3.03 | 3.21  | 2.93  | 2.78  | 3.44  |
| <b>F</b>                        |     |      | 2.11   | 0.99 | 3.14* | 2.11  | 0.99  | 0.54  |
| <b>Working hours (per week)</b> |     |      |        |      |       |       |       |       |
| <b>&lt;40 小时</b>                | 110 | 11.8 | 3.27   | 2.82 | 3.52  | 2.82  | 2.94  | 2.96  |
| <b>40-47 小时</b>                 | 509 | 54.7 | 3.26   | 2.73 | 3.59  | 2.73  | 2.95  | 2.87  |
| <b>48-55 小时</b>                 | 250 | 26.9 | 3.36   | 2.71 | 3.62  | 2.71  | 2.93  | 2.89  |
| <b>≥56 小时</b>                   | 61  | 6.6  | 3.52   | 2.93 | 3.75  | 2.93  | 3.36  | 3.13  |
| <b>F</b>                        |     |      | 0.06   | 0.20 | 0.48  | 0.20  | 0.01* | 0.11  |

\*p&lt;0.05 \*\*p&lt;0.01

**Table 2 Mean scores of the overall perception and subscales of work stress and work motivation in respect to the level of job satisfaction**

|                                                | Total (n=930)<br>Mean ± SD | Level of job satisfaction   |                                | P       |
|------------------------------------------------|----------------------------|-----------------------------|--------------------------------|---------|
|                                                |                            | Satisfied<br>(n=570, 61.3%) | Dissatisfied<br>(n=360, 38.7%) |         |
| <b>Work stress</b>                             |                            |                             |                                |         |
| <b>Overall perception *</b>                    | 3.11 ± 0.68                | 2.95 ± 0.68                 | 3.37 ± 0.60                    | P=0.000 |
| <b>work task &amp; role¶</b>                   | 3.31 ± 0.81                | 3.18 ± 0.82                 | 3.52 ± 0.76                    | P=0.000 |
| <b>career development¶</b>                     | 2.96 ± 0.87                | 2.79 ± 0.85                 | 3.22 ± 0.83                    | P=0.000 |
| <b>Wages &amp; benefits ¶</b>                  | 3.60 ± 0.95                | 3.38 ± 0.94                 | 3.95 ± 0.85                    | P=0.000 |
| <b>relationship¶</b>                           | 2.75 ± 0.79                | 2.61 ± 0.79                 | 2.96 ± 0.74                    | P=0.000 |
| <b>organizational structure &amp; climate¶</b> | 2.90 ± 0.79                | 2.74 ± 0.79                 | 3.15 ± 0.71                    | P=0.000 |
| <b>Work motivation</b>                         |                            |                             |                                |         |
| <b>Overall perception°</b>                     | 3.80 ± 0.55                | 3.86 ± 0.55                 | 3.70 ± 0.55                    | P=0.000 |
| <b>Career development†</b>                     | 4.13 ± 0.57                | 4.24 ± 0.51                 | 3.95 ± 0.62                    | P=0.000 |
| <b>Recognition†</b>                            | 3.58 ± 0.77                | 3.66 ± 0.77                 | 3.45 ± 0.77                    | P=0.000 |
| <b>Responsibility†</b>                         | 3.45 ± 0.77                | 3.53 ± 0.77                 | 3.32 ± 0.52                    | P=0.000 |
| <b>Finance†</b>                                | 4.06 ± 0.79                | 4.02 ± 0.79                 | 4.12 ± 0.80                    | P=0.295 |

\* Mean score of overall perception of work stress was calculated for each respondent by adding the value of each item of work stress and then divided by the numbers of all item.

°Mean score of overall perception of work motivation was calculated for each respondent by adding the value of each item of work motivation and then divided by the numbers of the item.

¶Mean score of each subscale of work stress was calculated for each respondent by adding the value of each item belongs to the subscale of work stress and then divided by the numbers of the item.

†Mean score of each subscale of work motivation was calculated for each respondent by adding the value of each item belongs to the subscale of work motivation and then divided by the numbers of the item.

**Table 3 The logistic regression analysis for job satisfaction\***

|                                                                    |                                         | B     | Odds<br>Ratio | 95% CI     | P     |
|--------------------------------------------------------------------|-----------------------------------------|-------|---------------|------------|-------|
| <b>Occupation</b><br>(Reference : nurse)                           | General practitioner                    | -0.89 | 0.56          | 0.38-0.81  | 0.001 |
|                                                                    | Public health physician                 | -1.24 | 0.42          | 0.20-0.87  | 0.021 |
|                                                                    | Other technical staff                   | 1.48  | 1.89          | 1.04-3.44  | 0.030 |
| <b>Sex</b><br>(Reference :male)                                    | Female                                  | 0.36  | 1.27          | 0.83-1.95  | 0.268 |
| <b>Educational background</b><br>(Reference :High school or below) | Junior college                          | -0.26 | 0.76          | 0.43-1.34  | 0.342 |
|                                                                    | College and above                       | -0.29 | 0.75          | 0.41-1.40  | 0.373 |
| <b>Age in years</b><br>(Reference : <25)                           | 25-34                                   | -0.50 | 0.60          | 0.30-1.21  | 0.151 |
|                                                                    | 35-44                                   | 0.10  | 1.10          | 0.51-2.42  | 0.796 |
|                                                                    | 45-54                                   | 0.03  | 1.04          | 0.45-2.35  | 0.926 |
|                                                                    | ≥55                                     | 2.14  | 8.53          | 1.86-39.01 | 0.006 |
| <b>Title</b><br>(Reference : senior title)                         | Vice-senior title                       | 0.65  | 1.86          | 0.476-7.29 | 0.371 |
|                                                                    | Middle title                            | 0.99  | 2.57          | 0.67-9.78  | 0.165 |
|                                                                    | Primary title                           | 1.23  | 3.84          | 0.96-15.39 | 0.057 |
|                                                                    | No title                                | 1.94  | 7.02          | 1.53-32.12 | 0.012 |
| <b>Monthly income in RMB</b><br>(Reference : <2000)                | 2000-2999                               | -0.68 | 0.50          | 0.26-0.98  | 0.051 |
|                                                                    | 3000-3999                               | -0.01 | 0.99          | 0.64-1.52  | 0.973 |
|                                                                    | ≥4000                                   | 0.26  | 1.30          | 0.86-1.97  | 0.201 |
| <b>Weekly hours worked</b><br>(Reference : <40)                    | 40-47                                   | -0.10 | 0.90          | 0.59-1.37  | 0.630 |
|                                                                    | 48-55                                   | 0.06  | 1.07          | 0.67-1.70  | 0.773 |
|                                                                    | ≥56                                     | 0.18  | 1.20          | 0.62-2.33  | 0.582 |
| <b>Work stress</b>                                                 | work task & role                        | -0.04 | 0.98          | 0.74-1.300 | 0.915 |
|                                                                    | career development                      | -0.36 | 0.68          | 0.49-0.94  | 0.020 |
|                                                                    | wages & benefits                        | -0.52 | 0.63          | 0.50-0.79  | 0.000 |
|                                                                    | relationship                            | -0.17 | 0.80          | 0.59-1.09  | 0.166 |
|                                                                    | Organizational structure<br>& climate r | -0.03 | 0.97          | 0.71-1.33  | 0.881 |

|                        |                    |       |      |            |       |
|------------------------|--------------------|-------|------|------------|-------|
| <b>Work motivation</b> | Career development | 0.17  | 1.13 | 0.85-1.505 | 0.399 |
|                        | Recognition        | 1.03  | 2.86 | 2.02-4.04  | 0.000 |
|                        | Responsibility     | 0.30  | 1.36 | 1.02-1.81  | 0.035 |
|                        | Finance            | -0.29 | 0.72 | 0.56-0.92  | 0.009 |

\*Strongly satisfied and satisfied coded as 1 vs. strongly dissatisfied and dissatisfied coded as 0.

**Acknowledgements** We are thankful to all the community health workers who participated in the study. We are also grateful to Yin Li, Xingsan Li, Zhuang Wang and Hongjuan Wei, who have worked closely with the team to ensure the field survey is successfully implemented.

**Completing interests** None.

### **Contributors**

LL was responsible for the study design, data analysis and the drafting and revising of the manuscript. HH and CH, who contributed equally as the first author to this article, were responsible for study design, data collection and data analysis. HZ and ZZ provided statistical expertise. XL, TS and HL performed data collection and technical support. LF provided administrative support. All authors read and approved the final manuscript.

**Funding** This study was funded by the National Science Foundation of China (NSFC), Contract No.71203050/G0308; and was supported by Young Seed Foundation of Public Health College of Harbin Medical

1  
2  
3  
4 University. The opinions expressed herein are the authors' and do not  
5  
6 necessarily reflect the views of NSFC and the survey was conducted  
7  
8 independently by researchers from Harbin Medical University.  
9  
10  
11  
12  
13  
14  
15  
16  
17  
18

### 19 **References**

- 20  
21 1. Starfield B, Shi LY, Macinko J. Contribution of primary care to  
22  
23 health systems and health. *Milbank Q* 2005;83: 457–502.  
24  
25
- 26 2. Hung LM, Rane S, Tsai J, et al. Advancing primary care to promote  
27  
28 equitable health: implications for China. *Int J Equity Health*  
29  
30 2012;11:2.  
31  
32
- 33 3. Heilongjiang Provincial Bureau. Heilongjiang Health Statistical  
34  
35 Yearbook 2012. Harbin, China: Heilongjiang Provincial Press 2013.  
36  
37
- 38 4. Zhou W, Dong YM, Lin XZ, et al. Community health service  
39  
40 capacity in China: a survey in three municipalities. *J Eval Clin Pract*  
41  
42 2013;19:167–172.  
43  
44
- 45 5. Li L, Zhou H, Yao GF, et al. Analysis on working motivation of  
46  
47 community health workers in Harbin, China. *Medicine and Society*  
48  
49 2013;7:40-43.  
50  
51
- 52 6. Park, Jungwee. Work stress and job performance. *Per Lab Inco*, 2008;  
53  
54 20:7-19.  
55  
56  
57  
58  
59  
60

- 1  
2  
3  
4 7. Cooper CL, Cartwright S. Healthy mind; healthy organization.-A  
5  
6 proactive approach to occupational stress. *Human Rel*  
7  
8 1994;47(4):455.  
9
- 10  
11 8. Shellenbarger S. Are saner workloads the unexpected key to more  
12  
13 productivity. *Wall Str J* 1999;10.  
14
- 15  
16 9. Kazufumi M, Kumiko S, Hiroki F, et al. Stressor scale for clinical  
17  
18 research coordinators: development and psychometric testing. *J Adv*  
19  
20 *Nurs* 2012; 2:1636-1645.  
21
- 22  
23 10. Kwok BC, Gina L, Yiu CK, et al. Work stress among six  
24  
25 professional groups: the Singapore experience. *Soc Sci Med*  
26  
27 2000;50:1415-1432.  
28
- 29  
30 11. Cooper CL, Marshall J. Occupational sources of stress: a review of  
31  
32 the literature relating to coronary heart disease and mental ill health.  
33  
34 *J Occu Psychol* 1976;49:441-461.  
35  
36
- 37  
38 12. Flanagan NA, Flanagan Timothy J. An analysis of the relationship  
39  
40 between job satisfaction and job stress in correctional nurses. *Res*  
41  
42 *Nurs Health* 2002;25(4):282–294.  
43  
44
- 45  
46 13. Sveinsdottir H, Biering P, Ramel A. Occupational stress, job  
47  
48 satisfaction, and working environment Icelandic nurses: a  
49  
50 cross-sectional questionnaire survey. *Int J Nurs Stud* 2006;  
51  
52 43(7):875–889.  
53  
54
- 55  
56 14. Zangaro GA, Soeken KL. A Meta-analysis of studies of nurses job  
57  
58  
59  
60

- 1  
2  
3  
4 satisfaction. *Res Nurs Health* 2007;30, 445–458.
- 5  
6 15. Nabiryephd RC, Brown KC, Pryor ER, et al. Occupational stress, job  
7  
8 satisfaction and job performance among hospital nurses in Kampala,  
9  
10 Uganda. *J Nurs Manag* 2011;19,760-768.
- 11  
12  
13 16. Franco LM, Bennett S, Kanfer R. Health sector reform and public  
14  
15 sector health worker motivation: a conceptual framework. *Soc Sci*  
16  
17 *Med* 2002;54:1255–1266.
- 18  
19  
20 17. Nahavandi, Afsaneh, Malekzadeh, et al. Organizational behavior:  
21  
22 The person-organization fit, Prentice Hall 1999.
- 23  
24  
25 18. Kanfer R. Measuring health worker motivation in developing  
26  
27 countries. Partnerships for Health Reform Project, Major Applied  
28  
29 Research Working Paper 1999.
- 30  
31  
32 19. Patrick MM, Duane B, Lucy G, et al. Developing a tool to measure  
33  
34 health worker motivation in district hospitals in Kenya. *Hum Resour*  
35  
36 *Health* 2009; 7:40.
- 37  
38  
39 20. Wilbroad M, Helen A, Virginia B, et al. Measuring health workers'  
40  
41 motivation in rural health facilities: baseline results from three study  
42  
43 districts in Zambia. *Hum Resour Health* 2013;11,8.
- 44  
45  
46 21. Tribolet WC. The relationship between intrinsic and extrinsic  
47  
48 motivation and organizational commitment: a study in a European  
49  
50 environment [D]. Nova Southeastern Univ 2004.
- 51  
52  
53 22. Pool SW. The relationship of job satisfaction with substitutes of  
54  
55  
56  
57  
58  
59  
60



- 1  
2  
3  
4 leadership, leadership behavior, and work motivation. *J Psychol*  
5  
6 1997;131(3):271-83.  
7  
8  
9 23. Stringer C, Jeni D, Theivananthampillai. Motivation, pay satisfaction,  
10 and job satisfaction of front-line employees. *Qual Res Acco Man*  
11  
12 2011; 8(2):161-179.  
13  
14  
15 24. Ge C, Fu JL, Chang Y, et al. Factors associated with job satisfaction  
16 among Chinese community health workers: a cross-sectional study.  
17  
18 *BMC Public Health*, 2011;11:884.  
19  
20  
21 25. Chen TL, Huang MY, Su TH. Work motivation, work stress, and job  
22 satisfaction in between Taiwan and China-An empirical study.  
23  
24 *World Acad Sci, Eng Tech* 2012; 68, 1446-1450.  
25  
26  
27 26. Ajayi MP., Abimbola OH. Job satisfaction, organizational stress and  
28 employee performance: a study of NAPIMS. *Ife Psychol*  
29  
30 2013;21:75-82.  
31  
32  
33 27. Wayne SJ., Liden RC. Effects of impression management on  
34 performance ratings: a longitudinal study. *Acad Manage J*  
35  
36 1995;38:232-260.  
37  
38  
39 28. Gagne M, Deci EL. Self-determination theory and work motivation.  
40  
41 *J Organ Behav* 2005;26:331-362.  
42  
43  
44 29. Dieleman M, Cuong PV, Anh, LV, et al. Identifying factors for job  
45 motivation of rural health workers in North Vietnam. *Hum Resour*  
46  
47 *Health* 2003;1:10.  
48  
49  
50  
51  
52  
53  
54  
55  
56  
57  
58  
59  
60

- 1  
2  
3  
4 30. Wanous JP, Reichers AE, Hudy MJ. Overall job satisfaction: how  
5  
6 good are single-item measures? *J Appl Psychol* 1997;82:247–52.  
7
- 8  
9 31. Blau JR, Light, SC, Chamlin M. Individual and contextual effects on  
10  
11 stress and job satisfaction: A study of prison staff. *Work Occup*  
12  
13 1986;13, 131-156.  
14
- 15  
16 32. Byrd TG, Cochran JK, Silverman IJ, et al. Behind bars: An  
17  
18 assessment of the effects of job satisfaction, job-related stress, and  
19  
20 anxiety on jail employees' inclinations to quit. *J Cri Justice* 2000;  
21  
22 23:69-89.  
23  
24
- 25  
26 33. Lephalala RP. Factors influencing nurses job satisfaction in selected  
27  
28 private hospitals in England. *Curationis* 2008;31(3): 60–69.  
29  
30
- 31  
32 34. Carr KK, Kazanowski MK. Factors affecting job satisfaction of  
33  
34 nurses who work in long-term care. *J Adv Nurs* 1994;19:878-883.  
35  
36
- 37  
38 35. McGowan B. Self-reported stress and its effects on nurses. *Nurs*  
39  
40 *Stand* 2001;15(42):33–38.  
41
- 42  
43 36. Lee I. Wang HH. Perceived occupational stress and related factors in  
44  
45 public health nurses. *J Nurs Res* 2002;10(4):253–259.  
46
- 47  
48 37. Callaghan P, Tak-Ying SA, Wyatt PA. Factors related to stress and  
49  
50 coping among Chinese nurses in Hong Kong. *J Adv Nurs* 2000;31(6),  
51  
52 1518 –1527.  
53
- 54  
55 38. Becchetti L, Castriota S, Tortia EC. Productivity, wages and intrinsic  
56  
57 motivations. *Sma Bus Eco* 2012;41:379–399.  
58  
59  
60

- 1  
2  
3  
4 39. Frey BS. On the relationship between intrinsic and extrinsic work  
5  
6 motivation. *Int J Ind Organ* 1997;15(4),427-439.  
7  
8  
9 40. Taylor FW. *Shop management*. New York: Harper 1911.  
10  
11 41. Dermer, Jerry. The interrelationship of intrinsic and extrinsic  
12  
13 motivation. *Acad Manage J* 1975;18(1):125-129.  
14  
15  
16 42. National Bureau of Statistics. *China Statistic Yearbook 2013*.  
17  
18 Beijing ,China: China Sta Press. 2013.  
19  
20  
21 43. Malik AA, Yamamoto SS, Souares A, et al. Motivational  
22  
23 determinants among physicians in Lahore Pakistan. *BMC Health*  
24  
25 *Serv Res* 2010;10:201.  
26  
27  
28  
29 44. Rout U. Gender differences in stress, satisfaction and mental  
30  
31 wellbeing among general practitioners in England. *Psychol Health*  
32  
33 *Med*. 1999;4(4):345-354.  
34  
35  
36 45. David PH, Srinika DJ. Gender differences in work stress among  
37  
38 clinical social workers. *J Soc Serv Res* 2008;10:18.  
39  
40  
41  
42  
43  
44  
45  
46  
47  
48  
49  
50  
51  
52  
53  
54  
55  
56  
57  
58  
59  
60

STROBE Statement—Checklist of items that should be included in reports of *cross-sectional studies*

|                              | Item No | Recommendation                                                                                                                                                                                                                                                                                                                             | Reported on page # |
|------------------------------|---------|--------------------------------------------------------------------------------------------------------------------------------------------------------------------------------------------------------------------------------------------------------------------------------------------------------------------------------------------|--------------------|
| <b>Title and abstract</b>    | 1       | (a) Indicate the study's design with a commonly used term in the title or the abstract                                                                                                                                                                                                                                                     | 2, 7               |
|                              |         | (b) Provide in the abstract an informative and balanced summary of what was done and what was found                                                                                                                                                                                                                                        | 2                  |
| <b>Introduction</b>          |         |                                                                                                                                                                                                                                                                                                                                            |                    |
| Background/rationale         | 2       | Explain the scientific background and rationale for the investigation being reported                                                                                                                                                                                                                                                       | 4, 5               |
| Objectives                   | 3       | State specific objectives, including any prespecified hypotheses                                                                                                                                                                                                                                                                           | 6                  |
| <b>Methods</b>               |         |                                                                                                                                                                                                                                                                                                                                            |                    |
| Study design                 | 4       | Present key elements of study design early in the paper                                                                                                                                                                                                                                                                                    | 7                  |
| Setting                      | 5       | Describe the setting, locations, and relevant dates, including periods of recruitment, exposure, follow-up, and data collection                                                                                                                                                                                                            | 7                  |
| Participants                 | 6       | (a) Give the eligibility criteria, and the sources and methods of selection of participants                                                                                                                                                                                                                                                | 7,8                |
| Variables                    | 7       | Clearly define all outcomes, exposures, predictors, potential confounders, and effect modifiers. Give diagnostic criteria, if applicable                                                                                                                                                                                                   | 9-12               |
| Data sources/<br>measurement | 8*      | For each variable of interest, give sources of data and details of methods of assessment (measurement). Describe comparability of assessment methods if there is more than one group                                                                                                                                                       |                    |
| Bias                         | 9       | Describe any efforts to address potential sources of bias                                                                                                                                                                                                                                                                                  | 7                  |
| Study size                   | 10      | Explain how the study size was arrived at                                                                                                                                                                                                                                                                                                  | 7                  |
| Quantitative variables       | 11      | Explain how quantitative variables were handled in the analyses. If applicable, describe which groupings were chosen and why                                                                                                                                                                                                               | 7-9                |
| Statistical methods          | 12      | (a) Describe all statistical methods, including those used to control for confounding<br>(b) Describe any methods used to examine subgroups and interactions<br>(c) Explain how missing data were addressed<br>(d) If applicable, describe analytical methods taking account of sampling strategy<br>(e) Describe any sensitivity analyses | 7-9                |
| <b>Results</b>               |         |                                                                                                                                                                                                                                                                                                                                            |                    |
| Participants                 | 13*     | (a) Report numbers of individuals at each stage of study—eg numbers potentially eligible, examined for eligibility, confirmed eligible, included in the study, completing follow-up, and analysed<br>(b) Give reasons for non-participation at each stage<br>(c) Consider use of a flow diagram                                            |                    |
| Descriptive data             | 14*     | (a) Give characteristics of study participants (eg demographic, clinical, social) and information on exposures and potential confounders<br>(b) Indicate number of participants with missing data for each variable of interest                                                                                                            |                    |
| Outcome data                 | 15*     | Report numbers of outcome events or summary measures                                                                                                                                                                                                                                                                                       |                    |

|                                                                   |                          |    |                                                                                                                                                                                                              |       |
|-------------------------------------------------------------------|--------------------------|----|--------------------------------------------------------------------------------------------------------------------------------------------------------------------------------------------------------------|-------|
| 1<br>2<br>3<br>4<br>5<br>6<br>7<br>8<br>9<br>10<br>11<br>12<br>13 | Main results             | 16 | (a) Give unadjusted estimates and, if applicable, confounder-adjusted estimates and their precision (eg, 95% confidence interval). Make clear which confounders were adjusted for and why they were included |       |
|                                                                   |                          |    | (b) Report category boundaries when continuous variables were categorized                                                                                                                                    |       |
|                                                                   |                          |    | (c) If relevant, consider translating estimates of relative risk into absolute risk for a meaningful time period                                                                                             |       |
|                                                                   | Other analyses           | 17 | Report other analyses done—eg analyses of subgroups and interactions, and sensitivity analyses                                                                                                               | 11    |
| 14                                                                | <b>Discussion</b>        |    |                                                                                                                                                                                                              |       |
| 15                                                                | Key results              | 18 | Summarise key results with reference to study objectives                                                                                                                                                     | 9-12  |
| 16<br>17<br>18<br>19<br>20<br>21<br>22<br>23                      | Limitations              | 19 | Discuss limitations of the study, taking into account sources of potential bias or imprecision. Discuss both direction and magnitude of any potential bias                                                   | 3,16  |
| 24<br>25<br>26                                                    | Interpretation           | 20 | Give a cautious overall interpretation of results considering objectives, limitations, multiplicity of analyses, results from similar studies, and other relevant evidence                                   | 12-15 |
| 27                                                                | Generalisability         | 21 | Discuss the generalisability (external validity) of the study results                                                                                                                                        | 12    |
| 28                                                                | <b>Other information</b> |    |                                                                                                                                                                                                              |       |
| 29<br>30<br>31<br>32<br>33                                        | Funding                  | 22 | Give the source of funding and the role of the funders for the present study and, if applicable, for the original study on which the present article is based                                                | 22    |

\*Give information separately for exposed and unexposed groups.

**Note:** An Explanation and Elaboration article discusses each checklist item and gives methodological background and published examples of transparent reporting. The STROBE checklist is best used in conjunction with this article (freely available on the Web sites of PLoS Medicine at <http://www.plosmedicine.org/>, Annals of Internal Medicine at <http://www.annals.org/>, and Epidemiology at <http://www.epidem.com/>). Information on the STROBE Initiative is available at [www.strobe-statement.org](http://www.strobe-statement.org).

# BMJ Open

## Work stress, work motivation and their effects on job satisfaction for community health workers: A cross-sectional survey in China

|                                 |                                                                                                                                                                                                                                                                                                                                                                                                                                                                                                                                                                                                                                                                                                                                                                                                                                                                                                    |
|---------------------------------|----------------------------------------------------------------------------------------------------------------------------------------------------------------------------------------------------------------------------------------------------------------------------------------------------------------------------------------------------------------------------------------------------------------------------------------------------------------------------------------------------------------------------------------------------------------------------------------------------------------------------------------------------------------------------------------------------------------------------------------------------------------------------------------------------------------------------------------------------------------------------------------------------|
| Journal:                        | <i>BMJ Open</i>                                                                                                                                                                                                                                                                                                                                                                                                                                                                                                                                                                                                                                                                                                                                                                                                                                                                                    |
| Manuscript ID:                  | bmjopen-2014-004897.R1                                                                                                                                                                                                                                                                                                                                                                                                                                                                                                                                                                                                                                                                                                                                                                                                                                                                             |
| Article Type:                   | Research                                                                                                                                                                                                                                                                                                                                                                                                                                                                                                                                                                                                                                                                                                                                                                                                                                                                                           |
| Date Submitted by the Author:   | 13-May-2014                                                                                                                                                                                                                                                                                                                                                                                                                                                                                                                                                                                                                                                                                                                                                                                                                                                                                        |
| Complete List of Authors:       | Li, Li; School of Public Health, Harbin Medical University, Department of Health Management<br>Hu, Hongyan; The Second Affiliated Hospital, Harbin Medical University, Research Service Office<br>Zhou, Hao; Center for Disease Control and Prevention, Department of Emergency<br>He, Changzhi; School of Public Health, Harbin Medical University, Department of Health Management<br>Fan, Lihua; School of Public Health, Harbin Medical University, Department of Health Management<br>Liu, Xinyan; School of Public Health, Harbin Medical University, Department of Health Management<br>Zhang, Zhong; School of Public Health, Harbin Medical University, Department of Health Management<br>Li, Heng; School of Public Health, Harbin Medical University, Department of Health Management<br>Sun, Tao; School of Public Health, Harbin Medical University, Department of Health Management |
| <b>Primary Subject Heading</b>: | Health services research                                                                                                                                                                                                                                                                                                                                                                                                                                                                                                                                                                                                                                                                                                                                                                                                                                                                           |
| Secondary Subject Heading:      | Public health                                                                                                                                                                                                                                                                                                                                                                                                                                                                                                                                                                                                                                                                                                                                                                                                                                                                                      |
| Keywords:                       | Human resource management < HEALTH SERVICES ADMINISTRATION & MANAGEMENT, PUBLIC HEALTH, Organisation of health services < HEALTH SERVICES ADMINISTRATION & MANAGEMENT                                                                                                                                                                                                                                                                                                                                                                                                                                                                                                                                                                                                                                                                                                                              |
|                                 |                                                                                                                                                                                                                                                                                                                                                                                                                                                                                                                                                                                                                                                                                                                                                                                                                                                                                                    |

SCHOLARONE™  
Manuscripts

1  
2  
3  
4  
5  
6  
7  
8  
9  
10  
11  
12  
13  
14  
15  
16  
17  
18  
19  
20  
21  
22  
23  
24  
25  
26  
27  
28  
29  
30  
31  
32  
33  
34  
35  
36  
37  
38  
39  
40  
41  
42  
43  
44  
45  
46  
47  
48  
49  
50  
51  
52  
53  
54  
55  
56  
57  
58  
59  
60

**Work stress, work motivation and their effects on job  
satisfaction for community health workers: A cross-sectional  
survey in China**

Li Li\*<sup>1</sup>, Hongyan Hu<sup>2</sup>, Hao Zhou<sup>3</sup>, Changzhi He<sup>1</sup>, Lihua Fan<sup>1</sup>, Xinyan  
Liu<sup>1</sup>, Zhong Zhang, Heng Li<sup>1</sup>, Tao Sun<sup>1</sup>

<sup>1</sup> Department of Health Management, School of Public Health, Harbin  
Medical University, Harbin, China

<sup>2</sup> Research Service Office, The Second Affiliated Hospital, Harbin  
Medical University, Harbin, China

<sup>3</sup> Department of Emergency, Center for Disease Control and Prevention,  
Harbin, China

**Correspondence to** Li Li: [lilihmu@gmail.com](mailto:lilihmu@gmail.com)

## Abstract

**Objective:** It is well documented that both work stress and work motivation are key determinants of job satisfaction. The aim of this study was to examine levels of work stress and motivation and their contribution to job satisfaction among community health workers in Heilongjiang Province, China.

**Design:** Cross-sectional survey.

**Setting:** Heilongjiang Province, China.

**Participants:** The participants were 930 community health workers from six cities in Heilongjiang province.

**Primary and secondary outcome measures:** Multistage sampling procedures were used to measure socioeconomic and demographic status, work stress, work motivation, and job satisfaction. Logistic regression analysis was performed to assess key determinants of job satisfaction.

**Results:** There were significant differences in some subscales of work stress and work motivation by some of socioeconomic characteristics. Levels of overall stress perception and scores on all five work stress subscales were higher in dissatisfied workers relative to satisfied workers. However, levels of overall motivation perception and scores on the career development, responsibility, and recognition motivation subscales were higher in satisfied respondents relative to dissatisfied respondents. The main determinants of job satisfaction were occupation; age; title; income;



1  
2  
3  
4 the career development, and wages and benefits subscales of work stress;  
5  
6 the recognition, responsibility and financial subscales of work motivation.  
7

8  
9 **Conclusion:** The findings indicated considerable room for improvement  
10  
11 in job satisfaction among community health workers of Heilongjiang  
12  
13 Province in China. Health care managers and policymakers should take  
14  
15 both work stress and motivation into consideration, as two subscales of  
16  
17 work stress and one subscale of work motivation negatively influenced  
18  
19 job satisfaction and two subscales of work motivation positively  
20  
21 influenced job satisfaction.  
22  
23

24  
25  
26 **Keywords:** work stress; work motivation; job satisfaction; community  
27  
28 health service  
29

## 30 31 **ARTICLE SUMMARY**

### 32 33 **Article focus**

- 34  
35  
36 ▪How do the overall perception and subscales of work stress and  
37  
38 motivation relate to levels of job satisfaction?  
39
- 40  
41  
42 ▪Which facets of work stress and motivation are affected by  
43  
44 socioeconomic and demographic status?  
45
- 46  
47  
48 ▪How do work stress and motivation influence job satisfaction among  
49  
50 community health workers?

51  
52 **Key message** There is considerable room for improvement in job  
53  
54 satisfaction among community health workers, and health care managers  
55  
56 and policymakers should take both work stress and motivation into  
57  
58  
59  
60

1  
2  
3  
4 consideration.

5  
6 **Strengths and limitations of this study**  
7

8  
9 This study is one of the first of its kind to examine the combined effects  
10  
11 of work stress and work motivation on job satisfaction among urban  
12  
13 community health workers in China since the implementation of new  
14  
15 health system reform. However, the instrument used in this study is not  
16  
17 a commonly used international scale, there may be an inherent bias in  
18  
19 self-report measures, and the small sample may limit the generalizability  
20  
21 of the research findings.  
22  
23  
24  
25  
26  
27  
28  
29  
30  
31  
32  
33  
34  
35  
36  
37  
38  
39  
40  
41  
42  
43  
44  
45  
46  
47  
48  
49  
50  
51  
52  
53  
54  
55  
56  
57  
58  
59  
60

## INTRODUCTION

As the foundation of the three-tier health system in China, community health service institutions played a very important role in improving access to health care service, enhancing equity and improving health.<sup>1-2</sup>

In 2009, the Chinese central government promulgated a new set of health system reforms and called for the development of community health services. The state established basic public health service goals, which focused on providing health education, chronic disease management, and disease prevention services for urban and rural residents. From 2009 to 2012, the number of community health service institutions increased by 6,254 and the number of visits increased by 193,949 million. Therefore, community health centers and workers thereof, are very important in the process of health system reform.

Heilongjiang Province is located in Northeast China with population of about 38.1 million. There were 410 urban community health centers (CHCs) and 366 community health stations with 13,100 health workers as of December 31, 2012.<sup>3</sup> On average, there were 23 and 10 medical personnel in each community health center and community health station, respectively. Since the introduction of CHCs, difficulties concerning limited resources and insufficient and poorly trained staff have been present. There were 5,416 practitioners (including assistant practitioners) in community health institutions in Heilongjiang province.<sup>3</sup> Based on the

1  
2  
3  
4 province population and human resource planning ratios, there is an  
5  
6 approximate shortfall of 30% in the number of general practitioners  
7  
8 (5,416 vs. 7,620) in 2012.<sup>4</sup> In addition, recent reforms have expanded  
9  
10 the scope of public health services and increased workload without  
11  
12 equivalent increases in staffing.<sup>5,6</sup>  
13  
14

15  
16 In some CHCs, general practitioners, public health physicians, and  
17  
18 nurses have been working in teams, providing medical and basic public  
19  
20 health services to community residents, both in the centers and during  
21  
22 home visits. With a late start, many of these practitioners were initially  
23  
24 hospital-based specialists, and majority of public health physicians did  
25  
26 not have a public health background. To improve skills and knowledge,  
27  
28 continuing medical education was compulsory and no fewer than 25  
29  
30 credit points were required per year. Other challenges found in the CHCs  
31  
32 were lower wages and fewer title promotion opportunities relative to  
33  
34 general hospitals. Limited resources and a shortage of skilled health  
35  
36 workers created very tight bottlenecks in the provision of services, which  
37  
38 led to many community health workers experiencing work-related stress  
39  
40 and low motivation for work, in addition to receiving low salaries and  
41  
42 restricted opportunities for promotion.<sup>7-8</sup> Many studies have shown that  
43  
44 work stress and work motivation can greatly affect job satisfaction and, in  
45  
46 turn, the quality and delivery of health care. However, few studies have  
47  
48 focused on work stress and motivation and their effects on job  
49  
50  
51  
52  
53  
54  
55  
56  
57  
58  
59  
60

1  
2  
3  
4 satisfaction among Chinese community health workers since the  
5  
6 implementation of the new health system reform policy.  
7

8  
9 Work stress is of great concern to managers, employees, and other  
10  
11 stakeholders in organizations. It is a complex phenomenon and has a  
12  
13 multitude of definitions in a variety of theoretical models.<sup>9</sup> According to  
14  
15 Lazarus and Folkman's cognitive theory of stress and coping, work stress  
16  
17 was defined as the interaction between the individual and the  
18  
19 environment.<sup>10</sup> This theory suggested that when demands from the  
20  
21 environment exceed the available resources, the result was either stress or  
22  
23 coping, depending on the individual's appraisal of the stressors. Karasek's  
24  
25 demand-control model assumed that psychological strain resulted from  
26  
27 the joint effects of work demands and the degree of decision-making  
28  
29 freedom available to workers facing the demands.<sup>11</sup> The effort-reward  
30  
31 imbalance model proposed that work stress resulted from a mismatch  
32  
33 between high commitment and effort at work and low rewards, including  
34  
35 salary, recognition, and career promotion.<sup>12</sup> Nakasis and Ouzouni defined  
36  
37 work stress as the harmful physical and emotional responses that occur  
38  
39 when job requirements do not match workers' capabilities, resources, and  
40  
41 needs.<sup>13</sup> In general, a greater imbalance between demands and individual  
42  
43 abilities will result in greater stress.<sup>14</sup> Riggio classified work stress into  
44  
45 work task stress and work role stress.<sup>15</sup> Cooper and Marshall's model of  
46  
47 job stress proposed that intrinsic requirements of the job, role within the  
48  
49  
50  
51  
52  
53  
54  
55  
56  
57  
58  
59  
60

1  
2  
3  
4 organization, career development, organizational structure and climate,  
5  
6 and relationships at work constituted the domain of work-related stress  
7  
8 within an organization.<sup>16</sup> In our study, five subscales of work stress were  
9  
10 named based on this model. Existing research has identified heavy  
11  
12 workload, insufficient resources, work relations, lack of professional  
13  
14 respect, and lack of promotion opportunities as possibly the most salient  
15  
16 work stressors for community health workers.<sup>17-19</sup> Long-term stress may  
17  
18 not only be harmful to the health workers themselves but may also affect  
19  
20 community health service centers through employee dissatisfaction,  
21  
22 burnout, poor performance, or turnover intention.<sup>20,21-24</sup> Therefore, it is  
23  
24 important to reduce work stress.  
25  
26  
27  
28  
29

30  
31 Work motivation can be defined as the degree of an individual's  
32  
33 willingness to exert and maintain an effort towards attaining  
34  
35 organizational goals.<sup>25</sup> It reflected the interactions between workers and  
36  
37 their work environments. Nahavandi and Malekzadeh believed that  
38  
39 motivation represented a stable mind, aspiration, or interest within the  
40  
41 individual and can translate into action.<sup>26</sup> Motivation theory examined the  
42  
43 process of motivation and explained why people at work behave the way  
44  
45 they do in terms of efforts. Building on Vroom's expectancy-valence  
46  
47 theory of motivation, Porter and Lawler proposed a model of intrinsic and  
48  
49 extrinsic work motivation.<sup>27,28</sup> This model suggested that intrinsic and  
50  
51 extrinsic rewards were additive, and accounted for total job satisfaction.  
52  
53  
54  
55  
56  
57  
58  
59  
60

1  
2  
3  
4 Intrinsic motivation refers to doing something for the inherent satisfaction  
5  
6 involved and is highly autonomous (i.e., self-regulated). In contrast,  
7  
8 extrinsic motivation means doing something in order to obtain a separable  
9  
10 outcome (i.e. tangible or verbal rewards ).<sup>29,30</sup> Peters identified job content  
11  
12 and work environment, extrinsic benefits, autonomy and security, and  
13  
14 transparency as factors in work motivation for health workers using  
15  
16 factor analysis.<sup>31</sup> Patrick and Wilbrod developed a tool to measure health  
17  
18 worker motivation and revealed that organizational commitment,  
19  
20 conscientiousness, intrinsic job satisfaction, timeliness and attendance  
21  
22 were the major determinants of higher motivation.<sup>32-33</sup> Tribolet explored  
23  
24 the relationship between intrinsic and extrinsic motivation.<sup>34</sup> Hoonakker  
25  
26 found that nurses appreciated challenges and opportunities for new  
27  
28 learning and teamwork.<sup>35</sup> Pool explored the significant positive  
29  
30 association between work motivation and job satisfaction, whereas  
31  
32 Stringer found that intrinsic motivation was positively associated, and  
33  
34 extrinsic motivation negatively associated with job satisfaction.<sup>36-37</sup>  
35  
36  
37  
38  
39  
40  
41  
42  
43

44 In China, previous studies have reported that poor competency and  
45  
46 excessive workload were key work stressors among community health  
47  
48 workers.<sup>7,19</sup> Shi suggested that policymakers should focus on training and  
49  
50 educational opportunities for primary care workers and consider ways to  
51  
52 reduce workload stress and improve salaries. <sup>38</sup> Hung identified  
53  
54 professional development, training opportunities, living environment,  
55  
56  
57  
58  
59  
60

1  
2  
3  
4 benefits, and working conditions as the most important motivating factors  
5  
6 for primary care providers in China.<sup>39</sup> Ge analyzed the relationship  
7  
8 between work stress and job satisfaction among Chinese community  
9  
10 health workers and reported that a degree of freedom in decision making  
11  
12 and good workplace relationships were positive predictors of job  
13  
14 satisfaction.<sup>40</sup> Chen investigated relationships between work motivation,  
15  
16 work stress and job satisfaction in cross-strait employees in Taiwan and  
17  
18 mainland China.<sup>41</sup>

19  
20  
21 The present study focused on the major factors affecting work stress  
22  
23 and motivation identified in previous research and provided an overview  
24  
25 of community health workers' perspectives of work stress and motivation  
26  
27 factors.<sup>16, 42-44</sup> The purpose of this study was to assess the predictors of  
28  
29 job satisfaction among community health workers in one Chinese  
30  
31 province. A cross-sectional survey was conducted to measure levels of  
32  
33 work stress, work motivation and job satisfaction. The key predictors of  
34  
35 job satisfaction for community health workers were assessed with special  
36  
37 attention devoted to work stress and motivation.  
38  
39  
40  
41  
42  
43  
44  
45  
46  
47  
48

## 49 **METHODS**

### 50 **Sample**

51  
52 A cross-sectional survey of community health workers was conducted  
53  
54 from March 1 to October 31, 2013 in Heilongjiang Province, China.  
55  
56  
57  
58  
59  
60



1  
2  
3  
4 Based on the literature about community health services in China, a  
5  
6 multistage, stratified sampling design was employed to ensure that study  
7  
8 data were provincially representative.<sup>7,40</sup> First, six cities (Harbin,  
9  
10 Qiqihar, Suihua, Jiamusi, Qitaihe, and Heihe) were selected based on  
11  
12 GDP figures and three levels of the development of the community health  
13  
14 service. Second, 15 community health centers were randomly selected  
15  
16 from each city. On average, there were 22 medical personnel in each of  
17  
18 the selected community health centers. Third, 60% of general  
19  
20 practitioners, public health physicians, nurses and other health technical  
21  
22 staff in each center were chosen randomly, with the exception of those  
23  
24 who were absent. The research team invited all the selected staff  
25  
26 members to participate in the study. The questionnaire included a cover  
27  
28 page explaining the purposes and procedures of the study. The data were  
29  
30 collected anonymously and the respondents completed the survey  
31  
32 questionnaires privately to ensure confidentiality. Respondents were  
33  
34 assured that participation in the survey was voluntary, and the return of  
35  
36 questionnaires represented informed consent. The research staff stayed at  
37  
38 the community health center and answered respondents' questions during  
39  
40 the process of survey completion. Respondents were able to choose the  
41  
42 best time to complete the questionnaire, such as when they were not busy  
43  
44 or their offices were quiet. Most completed questionnaires were collected  
45  
46 on site by the investigator on the day of the visit. If some respondents did  
47  
48  
49  
50  
51  
52  
53  
54  
55  
56  
57  
58  
59  
60

1  
2  
3  
4 not finish that day, investigators set a date to retrieve the questionnaires.  
5  
6 Respondents were asked to seal the completed questionnaires into  
7  
8 individual envelopes provided by the research team. The questionnaire  
9  
10 was relatively brief and no private personal information was collected.  
11  
12 There were 980 questionnaires delivered to community health workers,  
13  
14 all of which were returned. However, 50 (5.1%) were incomplete or even  
15  
16 blank, which left 930 valid questionnaires. This study was approved by  
17  
18 Medical Ethic Committee of Harbin Medical University.  
19  
20  
21  
22  
23  
24  
25

### 26 **Assessment tools**

27  
28 In the present study, Porter and Lawler's intrinsic and extrinsic  
29  
30 motivation model, and Vroom's expectancy-valence motivation theory  
31  
32 were used to analyze the relationship between work motivation and job  
33  
34 satisfaction. Lazarus and Folkman's cognitive theory of stress and  
35  
36 coping, and Karasek's demand-control model were used to analyze the  
37  
38 relationship between work stress and job satisfaction.<sup>10-11</sup>  
39  
40  
41  
42  
43

44 The study instrument was part of a self-administered questionnaire  
45  
46 composed of four sections. Section 1 focused on respondents'  
47  
48 socioeconomic and demographic status.  
49  
50

51 Section 2 assessed work stress. Thirty items related to work stress  
52  
53 were developed through intensive qualitative interviews with  
54  
55 policymakers, health care managers and community health workers, a  
56  
57  
58  
59  
60

1  
2  
3  
4 review of the literature, and an initial pilot study.<sup>16,42</sup> Then factor analysis,  
5  
6 which was not discussed in this paper, yielded a five-subscale structure  
7  
8 that comprised a total of 26 items. The five-subscale solution accounted  
9  
10 for 69.43% of the overall variance, and was found to be internally  
11  
12 consistent (overall Cronbach's  $\alpha=0.87$ ). Based on Cooper and Marshall's  
13  
14 model of job stress, these five subscales of work stress were named work  
15  
16 task and role, career development, wages and benefits, workplace  
17  
18 relationships, and organizational structure and climate stress.<sup>16</sup> They  
19  
20 individually accounted for 16.05%, 25.10%, 12.00%, 9.08% and 7.20%  
21  
22 of the overall variance, respectively, and the Cronbach's Alpha within  
23  
24 individual subscale ranged from 0.85 to 0.90. Respondents were asked to  
25  
26 rate their perception of work stress on each item based on a 5-point Likert  
27  
28 scale, very less stressful (1), less stressful (2), average (3), stressful (4)  
29  
30 and very stressful (5). The Cronbach's alpha value for this study was  
31  
32 0.87.  
33  
34  
35  
36  
37  
38  
39

40  
41 Section 3 assessed work motivation. Twenty-one items were  
42  
43 developed based on previous research, panel discussions, and an initial  
44  
45 pilot study.<sup>43-45</sup> Then 3 items were deleted and the 18 retained items were  
46  
47 divided into four subscales by factor analysis, which was not discussed in  
48  
49 this paper. The four-subscale solution accounted for 65.10% of the overall  
50  
51 variance, and was found to be internally consistent (overall Cronbach's  
52  
53  $\alpha=0.75$ ). The subscales were renamed based on the conceptual meaning  
54  
55  
56  
57  
58  
59  
60

1  
2  
3  
4 of the items and comprised: career development, recognition,  
5  
6 responsibility, and financial motivation. They individually accounted for  
7  
8 21.20%, 19.40%, 14.60% and 9.90% of the overall variance, and the  
9  
10 Cronbach's Alpha within individual subscale ranged from 0.82 to 0.89.  
11  
12 According to Porter and Lawler's intrinsic and extrinsic motivation  
13  
14 model, we defined career development and financial motivation as  
15  
16 extrinsic motivation, and recognition and responsibility motivation as  
17  
18 intrinsic motivation.<sup>28,44</sup> Respondents were asked to rate their motivation  
19  
20 intensity on each item based on a 5-point Likert scale, very less strong (1),  
21  
22 less strong (2), average (3), strong (4) and very strong (5).  
23  
24  
25  
26  
27  
28

29 Section 4 assessed job satisfaction. In this study, a single-item  
30  
31 measure was used to measure overall job satisfaction.<sup>46</sup> Respondents  
32  
33 were asked to indicate their level of job satisfaction on a 4-point Likert  
34  
35 scale, strongly dissatisfied (1), dissatisfied (2), satisfied (3) and  
36  
37 dissatisfied (4). During the process of data analysis, strongly satisfied and  
38  
39 satisfied were coded as 1, while strongly dissatisfied and dissatisfied were  
40  
41 coded as 0.  
42  
43  
44  
45  
46  
47  
48

### 49 **Data analysis**

50  
51 Survey results were analyzed using SPSS 17.0. Descriptive analyses  
52  
53 included frequencies and percentages for categorical variables and means  
54  
55 and standard deviations (SDs) for continuous variables. Mean differences  
56  
57  
58  
59  
60

1  
2  
3  
4 were examined using t-tests and ANOVAs for relevant subgroups. We  
5  
6 used logistic regression to measure the key predictors of job satisfaction  
7  
8 because the dependent variable (job satisfaction) was a binary variable,  
9  
10 which made linear regression unsuitable.  
11  
12

## 13 14 15 16 **RESULTS**

### 17 18 **Socioeconomic and demographic status of respondents**

19  
20 Socioeconomic and demographic status of the sample were shown in  
21  
22 Table 1. A majority of the participants were female (74.6%). General  
23  
24 practitioners accounted for 36% of community health workers surveyed,  
25  
26 followed by nurses (28.8%), public health physician (19.1%). In this  
27  
28 survey, only 18.6% of them had senior professional titles and less than  
29  
30 half (40.2%) of them had bachelor degree or higher. Only 19.6% of them  
31  
32 had monthly incomes of more than 3,000 RMB (where  
33  
34 \$1.00US=6.23RMB in 2012). Nearly ninety percent of respondents  
35  
36 worked more than 40 hours per week.  
37  
38  
39  
40  
41  
42

### 43 44 **Work stress and motivation according to socioeconomic and** 45 46 **demographic factors**

47  
48 Results of variance analysis and further multiple comparison t-tests were  
49  
50 shown in Table 1. There were significant differences in scores for all of  
51  
52 the five subscales of work stress according to occupation ( $p < 0.01$ ) and  
53  
54 gender ( $p < 0.05$ ), with general practitioners and men showing higher  
55  
56  
57  
58  
59  
60

1  
2  
3  
4 levels of work stress.

5  
6 Scores for the wages and benefits subscale of work stress differed  
7  
8 significantly according to educational background ( $p < 0.05$ ) and income  
9  
10 ( $p < 0.05$ ). Mid-level professionals reported significantly higher levels of  
11  
12 stress on the work task and role subscale ( $p < 0.01$ ) and in workplace  
13  
14 relationships ( $p < 0.05$ ). Participants aged 35–44 and 45–54 years  
15  
16 reported significantly higher levels of stress on the work task and role  
17  
18 subscale ( $p < 0.01$ ).  
19  
20  
21  
22

23  
24 The male had significant higher level recognition and financial  
25  
26 motivation ( $p < 0.05$ ). Younger workers ( $< 25$ ) had significantly higher  
27  
28 level of recognition motivation ( $p < 0.05$ ) and responsibility motivation  
29  
30 ( $p < 0.05$ ). A higher level of recognition motivation was expressed by  
31  
32 general practitioners ( $p < 0.05$ ).  
33  
34  
35

36  
37 There were no significant differences in any of the four work  
38  
39 motivation subscale scores according to educational background,  
40  
41 professional title, or income. Men reported significantly higher levels of  
42  
43 recognition and financial motivation ( $p < 0.05$ ). Younger workers ( $< 25$ )  
44  
45 reported significantly higher levels of recognition ( $p < 0.05$ ) and  
46  
47 responsibility motivation ( $p < 0.05$ ). General practitioners reported higher  
48  
49 levels of recognition motivation ( $p < 0.05$ ).  
50  
51  
52  
53  
54  
55

56  
57 **Insert Table 1 here**  
58  
59  
60

### Levels of work stress, work motivation, and job satisfaction

The mean score for overall perception of work stress was 3.11, which is slightly higher than the mid-point of 3 (Table 2). Wages and benefits (3.60) subscale of work stress ranked in the highest position, followed by work task and role (3.31), career development (2.96), organizational structure and climate (2.90), and relationships (2.75) ( $F=154.9$ ,  $p<0.001$ ). Statistically significant differences were noted in overall perception of stress and scores on all five work stress subscales between satisfied and dissatisfied respondents; those who were dissatisfied reported higher levels of work stress ( $p < 0.001$ ).

Career development motivation was rated the highest level, followed by financial, recognition and responsibility motivation ( $F=202.6$ ,  $p<0.001$ ). Levels of overall perception of work motivation and all subscales with the exception of financial motivation were significantly different between the satisfied and dissatisfied groups of respondents, and the satisfied workers had higher levels of work motivation ( $p<0.01$ ).

In respect to motivation, career development was rated highest, followed by financial, recognition, and responsibility motivation ( $F = 202.6$ ,  $p < 0.001$ ). Levels of overall perception of motivation and scores on all work motivation subscales, with the exception of financial motivation, differed significantly between the satisfied and dissatisfied

1  
2  
3  
4 respondents, and the satisfied workers reported higher levels of work  
5  
6 motivation ( $p < 0.01$ ).  
7  
8  
9

10  
11 **Insert Table 2 here**  
12

### 13 14 15 **Predictors of job satisfaction** 16

17  
18 In this study, 61.3% of respondents were satisfied with their jobs. Table 3  
19  
20 presented results of a logistic regression model that examined the key  
21  
22 predictors of job satisfaction, with special attention devoted to work  
23  
24 stress and work motivation.  
25  
26  
27

28  
29 Only a few demographic characteristics were predictors of job  
30  
31 satisfaction. We found that when scores on the career development and  
32  
33 wages and benefits subscales of work stress increased by one grade, job  
34  
35 satisfaction decreased by 32% (odds ratio [OR] = 0.68,  $p < 0.05$ ) and  
36  
37 37% (OR = 0.63,  $p < 0.01$ ), respectively. When financial motivation  
38  
39 increased by one grade, job satisfaction decreased by 28% (OR = 0.72,  $p$   
40  
41  $< 0.01$ ), and when recognition motivation and responsibility motivation  
42  
43 increased by one grade, job satisfaction increased 1.86 (OR = 2.86,  $p <$   
44  
45 0.01) and 0.36 times (OR = 1.36,  $p < 0.05$ ), respectively. Compared with  
46  
47 nurses, general practitioners (OR = 0.56,  $p < 0.01$ ) and public health  
48  
49 physicians (OR = 0.42,  $p < 0.05$ ) reported lower job satisfaction, while  
50  
51 other technical staff (OR = 1.89) reported higher job satisfaction. Workers  
52  
53  
54  
55  
56  
57  
58  
59  
60



1  
2  
3  
4 with no title (OR = 7.02,  $p < 0.05$ ) were more satisfied than workers with  
5  
6 a senior title.  
7  
8  
9

10  
11 **Insert Table 3 here**  
12

## 13 14 15 16 **Discussion** 17

18 Job satisfaction in community health workers is important for the  
19 sustainable development of basic healthcare in China, but health  
20 policymakers and managers have neglected it for a long time.<sup>47</sup> This study  
21 was one of the first of its kind to examine the level of work stress and  
22 work motivation and their combined effects on job satisfaction among  
23 urban community health workers in China since the implementation of  
24 new health system reform.  
25  
26  
27  
28  
29  
30  
31  
32  
33  
34

35  
36 Results indicated that the wages and benefits subscale of stress  
37 ranked highest, followed by the work task and role subscale. Similarly,  
38 previous research related to work stress found that low salary, heavy  
39 workload, and few promotion opportunities were the most frequently  
40 cited workplace stressors.<sup>49,50</sup> Several reasons may have contributed to  
41 these findings. In Heilongjiang Province, the average annual income of  
42 health service personnel in urban hospitals was 52,564 RMB (\$1.00US =  
43 6.23RMB) in 2012. In this study, 80.4% of the respondents' annual  
44 incomes were lower than 36,000 RMB. These low salaries for community  
45  
46  
47  
48  
49  
50  
51  
52  
53  
54  
55  
56  
57  
58  
59  
60

1  
2  
3  
4 health workers increased their wages and benefits stress.<sup>48</sup> In the  
5  
6  
7  
8  
9  
10  
11  
12  
13  
14  
15  
16  
17  
18  
19  
20  
21  
22  
23  
24  
25  
26  
27  
28  
29  
30  
31  
32  
33  
34  
35  
36  
37  
38  
39  
40  
41  
42  
43  
44  
45  
46  
47  
48  
49  
50  
51  
52  
53  
54  
55  
56  
57  
58  
59  
60

health workers increased their wages and benefits stress.<sup>48</sup> In the meanwhile, based on the province population and human resource planning ratios, there is an approximate shortfall of 30% in the number of general practitioners in 2012.<sup>4</sup> And the recent reforms have expanded the scope of public health services and increased workload without equivalent increases in staffing.<sup>5,6</sup>

Unfortunately, the present study found that scores on the career development, and wages and benefits subscales of work stress were negatively associated with job satisfaction. These findings were consistent with previous studies in which workers were likely to report low job satisfaction if they did not receive promotion and advancement opportunities or adequate salaries.<sup>22,33,52</sup>

With regard to work motivation, results showed the career development and financial subscales of work motivation ranked first and second respectively. Consistent with Hung and Hou's study, which found income, benefits, and professional development were the most important motivating factors among community health workers in China.<sup>39,51</sup>

In this study, we defined career development and financial motivation as extrinsic motivation and recognition and responsibility motivation as intrinsic motivation based on the literature.<sup>37,53</sup> Results reported that the recognition and responsibility subscales of work motivation were positive predictors of job satisfaction, and financial

1  
2  
3  
4 motivation was a negative predictor. This was consistent with the  
5  
6 “crowding-in” effect, which proposes that intrinsic motivation increases  
7  
8 job satisfaction, whereas extrinsic motivation decreases job satisfaction.<sup>54</sup>  
9  
10  
11 It should be noted that in this study, the level of extrinsic motivation was  
12  
13 higher than that of intrinsic motivation.  
14

15  
16 These findings have significant implications for managers of  
17  
18 community health centers and policymakers in their efforts to improve  
19  
20 workers’ job satisfaction. First, policymakers should take measures to  
21  
22 improve community health workers’ salaries. In China, basic public  
23  
24 health services are funded by the government and provided by  
25  
26 community health workers without cost to residents. If health workers are  
27  
28 dissatisfied with their salaries, they may prefer to work for profit-making  
29  
30 medical services instead of nonprofit public health services. In the  
31  
32 meanwhile, managers should implement appropriate performance salary  
33  
34 distribution system to arouse the enthusiasms of the staff and reduce their  
35  
36 financial stress. Second, policymakers should focus on appropriate  
37  
38 promotion policies for community health workers. At present, it was  
39  
40 difficult for community health workers to get title promotion, for there  
41  
42 were limit promotion quotas for CHCs every year in Heilongjiang  
43  
44 Province and our study found only 18.6% of respondents had senior  
45  
46 professional title. Third, the managers should provide and support their  
47  
48 workers to attend training or continuing education. Fourth, managers and  
49  
50  
51  
52  
53  
54  
55  
56  
57  
58  
59  
60

1  
2  
3  
4 policymakers should take measures to inspire intrinsic motivation in  
5  
6 workers. Becchetti proposed that when workers do not work for financial  
7  
8 incentives, they may find satisfaction irrespective of their salaries, even if  
9  
10 the financial incentive is kept to a minimum, and may therefore be  
11  
12 satisfied with their jobs.<sup>53</sup> Therefore, managers and policymakers should  
13  
14 introduce more incentives to encourage community health workers to  
15  
16 work for responsibility or recognition.  
17  
18  
19

20  
21 As some subscales of work stress and work motivation can influence  
22  
23 job satisfaction either positively or negatively, we examined levels of  
24  
25 work stress and motivation according to demographic characteristics and  
26  
27 found that policymakers and managers should pay more attention to three  
28  
29 types of workers. The first group of workers included those aged between  
30  
31 35 and 54 years (35–44 and 45–54 age groups), who reported higher  
32  
33 levels of stress on the work task and role subscale and lower levels of  
34  
35 intrinsic motivation. Similar results have been reported; in Qu's study,  
36  
37 community health workers in mid-level age groups were significantly  
38  
39 more stressed than those in the youngest age group in one province of  
40  
41 China.<sup>55</sup> This could be related to workload or difficulty and complexity of  
42  
43 the work task, which is usually greater for 35- to 54-year-old workers, as  
44  
45 they are the backbone of community health services. Men form the  
46  
47 second group that requires attention. In our study, men's scores on all of  
48  
49 the work stress subscales tended to be higher than women's, and men  
50  
51  
52  
53  
54  
55  
56  
57  
58  
59  
60

1  
2  
3 reported higher levels of financial motivation.<sup>56</sup> However, another  
4  
5 Chinese study of primary health workers found no differences in financial  
6  
7 motivation.<sup>51</sup> David found that women reported more stress in the  
8  
9 financial rewards and role ambiguity subscales.<sup>57</sup> The final group of  
10  
11 workers identified as requiring attention consists of general practitioners,  
12  
13 who experienced the highest stress according to all five work stress  
14  
15 subscales and reported the highest career development motivation.  
16  
17  
18  
19  
20  
21 General practitioners in community health centers face more difficult and  
22  
23 complicated tasks and types of medical risk than other health care  
24  
25 workers do, and they receive lower salaries and fewer promotion  
26  
27 opportunities than their counterparts in general hospitals.  
28  
29  
30  
31  
32  
33

### 34 **Limitations of this study**

35  
36 The findings in this study should be viewed in light of four key  
37  
38 limitations. First, this study was based on a small sample of community  
39  
40 health workers, which may limit the generalizability of the research  
41  
42 findings. Based on the literature about community health services in  
43  
44 China, a multistage, stratified sampling design was employed to ensure  
45  
46 that study data were provincially representative.<sup>7,40</sup> A multistage,  
47  
48 stratified sampling design was used to ensure that study data were  
49  
50 provincially representative. Six sample cities were selected to account for  
51  
52 the variability in regional per capita gross domestic product, and the  
53  
54  
55  
56  
57  
58  
59  
60

1  
2  
3  
4 levels of healthcare development and 15 CHCs in each city were selected  
5  
6 randomly. On average, there are 23 medical technical personnel in a  
7  
8 community health center in Heilongjiang province and there were  
9  
10 approximately 22 health workers in each of the community health centers  
11  
12 in our study. In addition, the proportions of general practitioners, public  
13  
14 health physicians, nurses, and other medical technical personnel in this  
15  
16 study were close to the proportions found in the province as a whole.<sup>3</sup>  
17  
18  
19 Consequently, this sample was representative of Heilongjiang community  
20  
21 health service providers, thereby enhancing the potential for  
22  
23 generalization of the study findings. Second, the instrument for assess the  
24  
25 work stress and work motivation was developed from earlier study and  
26  
27 discussed with experts, while not an international commonly scale. Third,  
28  
29 we used a cross-sectional survey, which may limit our ability to identify  
30  
31 causal relationships between work stress and motivation and job  
32  
33 satisfaction. Fourth, the measurements were conducted by  
34  
35 self-administrated method and respondents' cognition can be affected by  
36  
37 emotions at that point in time. So the common method bias and  
38  
39 self-administrated bias might affect the results.  
40  
41  
42  
43  
44  
45  
46  
47  
48  
49  
50

## 51 **Conclusion**

52  
53 It is important for healthcare managers to improve the job satisfaction of  
54  
55 health workers in low-resource settings. In this study, we examined levels  
56  
57  
58  
59  
60

1  
2  
3  
4 of work stress and motivation according to demographic characteristics  
5  
6 and in respect to levels of job satisfaction; additionally, the key predictors  
7  
8 of job satisfaction were identified using logistic regression analysis. The  
9  
10 results indicated that community health workers rated wages and benefits  
11  
12 highest among five subscales of work stress, and workers' extrinsic  
13  
14 motivation was higher than their intrinsic motivation. The career  
15  
16 development, and wages and benefits subscales of work stress and  
17  
18 financial motivation were significant negative predictors of job  
19  
20 satisfaction, whereas the recognition and responsibility subscales of work  
21  
22 motivation were significant positive determinants.  
23  
24  
25  
26  
27

28  
29 Our findings suggest that there is considerable room for improvement in  
30  
31 the job satisfaction of community health workers in Heilongjiang  
32  
33 Province, and health care managers and policymakers should take both  
34  
35 work stress and work motivation into consideration. First, they should  
36  
37 pay more attention to three types of worker, as these particular groups  
38  
39 reported higher work stress and extrinsic motivation. Second, they should  
40  
41 take a variety of measures to reduce career development, and wage and  
42  
43 benefits stress, as they were negative determinants of job satisfaction.  
44  
45  
46  
47  
48 Third, it is important for managers and policymakers to inspire workers'  
49  
50 intrinsic motivation, as it can have a positive influence on job  
51  
52 satisfaction.  
53  
54  
55  
56  
57  
58  
59  
60

1  
2  
3  
4  
5  
6  
7 **Acknowledgements** We are thankful to all the community health workers who participated in the study. We are also  
8 grateful to Yin Li, Xingsan Li, Zhuang Wang and Hongjuan Wei, who have worked closely with the team to ensure the field  
9 survey is successfully implemented.  
10  
11

12  
13  
14 **Funding** This study was funded by the National Science Foundation of China (NSFC), Contract No.71203050/G0308,  
15 Contract No.71073034 and was supported by Young Seed Foundation of Public Health College of Harbin Medical  
16 University. The opinions expressed herein are the authors' and do not necessarily reflect the views of NSFC and the survey  
17 was conducted independently by researchers from Harbin Medical University.  
18  
19  
20  
21

### 22 **Contributors**

23  
24  
25  
26  
27 LiLi was responsible for the study design, data analysis and the drafting and revising of the manuscript. HongyanHu and  
28 ChangzhiHe, who contributed equally as the first author to this article, were responsible for study design, data collection  
29 and data analysis. HaoZzhou and ZhongZ hang provided statistical expertise. XinyanLiu, TaoSun and HengLi performed  
30 data collection and technical support. LihuaFan provided administrative support. All authors read and approved the final  
31 manuscript.  
32  
33  
34  
35  
36  
37  
38  
39  
40  
41  
42  
43  
44  
45  
46  
47  
48  
49



1  
2  
3  
4  
5  
6  
7 **Competing interests** None.  
8

9 **Data Sharing Statement:** The factor analysis of work stress and work motivation are available to Li Li at  
10  
11 lilihmu@gmail.com.  
12  
13  
14  
15  
16  
17  
18  
19  
20  
21  
22  
23  
24  
25  
26  
27  
28  
29  
30  
31  
32  
33  
34  
35  
36  
37  
38  
39  
40  
41  
42  
43  
44  
45  
46  
47  
48  
49

## References

1. Starfield B, Shi LY, Macinko J. Contribution of primary care to health systems and health. *Milbank Q* 2005;83: 457–502.
2. Hung LM, Rane S, Tsai J, et al. Advancing primary care to promote equitable health: implications for China. *Int J Equity Health* 2012;11:2.
3. Heilongjiang Provincial Bureau. Heilongjiang Health Statistical Yearbook 2012. Harbin, China: Heilongjiang Provincial Press 2013.
4. State Commission Office for Public Sector Reform. (2006). Notice on Issuing the Instruction Opinions on Organization Structure and Staffing of Urban Community Health Service. Beijing, China. [http://www.gov.cn/zwggk/2006-09/04/content\\_377067.htm](http://www.gov.cn/zwggk/2006-09/04/content_377067.htm) (accessed on 4 September 2006 ).
5. MOH (Ministry of Health of China ) Chinese Health statistics in 2010. Peking Union Medical College Press 2010.
6. MOH (Ministry of Health of China ) (2012) Chinese Health statistics in 2010. Peking Union Medical College Press.

- 1  
2  
3  
4  
5  
6  
7 7. Zhou W, Dong YM, Lin XZ, et al. Community health service capacity in China: a survey in three municipalities. *J Eval*  
8  
9 *Clin Pract* 2013;19(1):167–17.
- 10  
11 8. Li L, Zhou H, Yao GF, et al. Analysis on working motivation of community health workers in Harbin, China. *Medicine*  
12 *and Society (in Chinese)* 2013;7:40-43.
- 13  
14  
15  
16  
17 9. Clegg A. Occupational stress in nursing: a review of the literature. *J Nurs Manage* 2001; 9:101–106.
- 18  
19  
20 10. Lazarus RS. & Folkman S. *Stress, Appraisal and Coping*. Springer, New York, NY.1984.
- 21  
22 11. Karasek RA. Job demands, job decision latitude, and mental strain: implications for job re-design. *Administrative*  
23 *Science Quarterly* 1979; 24(2): 285–308.
- 24  
25  
26  
27 12. Siegrist J. Adverse health effects of high-effort/low-reward conditions. *J Occup Health Psychol* 1996; 1:27–41.
- 28  
29  
30 13. Nakasis K., Ouzouni C. Factors influencing stress and job satisfaction of nurses working in psychiatric units: a research  
31 *review*. *Heal Sci J* 2008;2 (4): 183–195.
- 32  
33  
34  
35 14. Jamal M. Burnout among Canadian and Chinese employees: a cross-cultural study. *European Management Review*  
36 *2005;2(3):224–230*.
- 37  
38  
39  
40  
41  
42  
43  
44  
45  
46  
47  
48  
49

15. Riggio R. Introduction to industrial organizational psychology. New Jersey: Pearson Education, Inc. 2003.
16. Cooper CL, Marshall J. Occupational sources of stress: a review of the literature relating to coronary heart disease and mental ill health. *J Occup Psychol* 1976; 49:11-28.
17. Kim HJ. Work Stress and Job Satisfaction of Community Mental Health Nurses in South Korea: A Qualitative Content Analysis. *J Korean Acad Psychiatr Ment Health Nurs* 2013;22(4):295-306.
18. Johnson SJ, O'Connor EM, Jacobs S, et al. The relationships among work stress, strain and self-reported errors in UK community pharmacy. *Research in Social and Administrative Pharmacy*. 2014;1.
19. Qu NQ, Zhou H, Fan LH, et al. Analysis on work stress and occupational burnout among community health service staff in Harbin. *Medicine and Society* 2013;26(9):87-89.
20. Chen XJ, Tan XR, Li LP. Health Problem and Occupational Stress among Chinese Doctors. *Chinese Medicine* 2013;4: 1-6.
21. Nabirye RC, Brown KC, Pryor ER et al. Occupational stress, job satisfaction and job performance among hospital nurses in Kampala, Uganda. *J Nurs Manage* 2011; 19:760–768.

- 1  
2  
3  
4  
5  
6  
7 22. Voltmer E, Rosta J, Johannes Siegrist, et al. Job stress and job satisfaction of physicians in private practice: comparison  
8 of German and Norwegian physicians. *Int Arch Occ Env Hea* 2012;85, (7):819-828.  
9  
10  
11 23. Saijo Y, Chiba S, Yoshioka E, et al. Job stress and burnout among urban and rural hospital physicians in Japan. *Aust J*  
12 *Rural Health* 2013;21( 4): 225–231.  
13  
14  
15 24. Sun Y, Luo ZN, Fang PQ. Factors Influencing the Turnover Intention of Chinese Community Health Service Workers  
16 Based on the Investigation Results of Five Provinces. *J Commun Health* 2013;38( 6):1058-1066.  
17  
18  
19 25. Franco LM, Bennett S, Kanfer R, et al. Determinants and consequences of health worker motivation in hospitals in  
20 Jordan and Georgia. *Soc Sci Med* 2004;58:343-355  
21  
22 26. Kanfer R. Measuring health worker motivation in developing countries. Partnerships for Health Reform Project, Major  
23 Applied Research Working Paper 1999.  
24  
25  
26  
27 27. Vroom, V. H. *Work and motivation*. New York: Wiley.1964.  
28  
29  
30  
31  
32 28. Porter LW, Lawler EE. *Managerial attitudes and performance*. Homewood, IL: Irwin-Dorsey 1968.  
33  
34  
35  
36 29. Ryan RM, Deci EL. Self-determination theory and the facilitation of intrinsic motivation, social development, and  
37  
38  
39  
40  
41  
42  
43  
44  
45  
46  
47  
48  
49

1  
2  
3  
4  
5  
6  
7 wellbeing. *Am Psychol* 2000; 55(1): 68–77.

- 8  
9 30. Ryan RM, Deci EL. Self-regulation and the problem of human autonomy: Does psychology need choice,  
10 self-determination, and will? *J Pers* 2006; 74(6):1558–1585.  
11  
12 31. Peters DH, Chakraborty S, Mahapatra P, et al. Job satisfaction and motivation of health workers in public and private  
13 sectors: cross-sectional analysis from two Indian states. *Hum Resour Health*. 2010;8:27.  
14  
15 32. Patrick MM, Duane B, Lucy G, et al. Developing a tool to measure health worker motivation in district hospitals in  
16 Kenya. *Hum Resour Health* 2009; 7:40.  
17  
18 33. Wilbroad M, Helen A, Virginia B, et al. Measuring health workers' motivation in rural health facilities: baseline results  
19 from three study districts in Zambia. *Hum Resour Health* 2013;11:8.  
20  
21 34. Tribolet WC. The relationship between intrinsic and extrinsic motivation and organizational commitment: a study in a  
22 European environment [D]. Nova Southeastern Univ 2004.  
23  
24 35. Hoonakker PL, Carayon P, McGuire K, et al. Motivation and job satisfaction of Tele-ICU nurses. *J Crit Care*  
25 2013;28:315.e13 -315.e21.  
26  
27  
28  
29  
30  
31  
32  
33  
34  
35  
36  
37  
38  
39  
40  
41  
42  
43  
44  
45  
46  
47  
48  
49

- 1  
2  
3  
4  
5  
6  
7 36. Pool SW. The relationship of job satisfaction with substitutes of leadership, leadership behavior, and work motivation. *J*  
8  
9 *Psychol* 1997;131(3):271-83.  
10  
11 37. Stringer C, Jeni D, Theivananthampillai. Motivation, pay satisfaction, and job satisfaction of front-line employees. *Qual*  
12  
13 *Res Acco Man* 2011; 8(2):161-179.  
14  
15  
16  
17 38. Shi L, Hung LM, Song K, et al. Chinese primary care physicians and work attitudes. *Int J Health Serv*  
18  
19 2013;43(1):167–181.  
20  
21  
22 39. Hung LM, Shi L, Wang H, et al. Chinese primary care providers and motivating factors on performance. *Fam Prac* 2013;  
23  
24 30:576–586.  
25  
26  
27 40. Ge C, Fu J, Chang Y, et al. Factors associated with job satisfaction among Chinese community health workers: a  
28  
29 cross-sectional study. *BMC Public Health*, 2011;24(11):884.  
30  
31  
32 41. Chen TL, Huang MY, Su TH. Work motivation, work stress, and job satisfaction in between Taiwan and China-An  
33  
34 empirical study. *World Acad Sci, Eng Tech* 2012; 68:1446-1450.  
35  
36  
37 42. Ajayi MP., Abimbola OH. Job satisfaction, organizational stress and employee performance: a study of NAPIMS. *Ife*  
38  
39  
40  
41  
42  
43  
44  
45

1  
2  
3  
4  
5  
6  
7 Psychol 2013;21:75-82.

- 8  
9 43. Wayne SJ, Liden RC. Effects of impression management on performance ratings: a longitudinal study. *Acad Manage J*  
10 1995;38:232-260.  
11  
12 44. Gagne M, Deci EL. Self-determination theory and work motivation. *J Organ Behav* 2005;26:331-362.  
13  
14 45. Dieleman M, Cuong PV, Anh, LV, et al. Identifying factors for job motivation of rural health workers in North Vietnam.  
15  
16 *Hum Resour Health* 2003;1:10.  
17  
18 46. Wanous JP, Reichers AE, Hudy MJ. Overall job satisfaction: how good are single-item measures? *J Appl Psychol*  
19 1997;82:247-52.  
20  
21 47. Chen J, Dong JQ, Ding J, et al. Analysis on satisfaction of professionals in community health service institutions held  
22 by different levels of hospital. *Chin Gen Pract* 2008;4(11): 631-634. (In Chinese)  
23  
24 48. National Bureau of Statistics. *China Statistic Yearbook 2013*. Beijing ,China: China Sta Press. 2013.  
25  
26 49. Ding H, Sun X, Chang WW, et al. A comparison of job satisfaction of community health workers before and after local  
27 comprehensive medical care reform: a typical field investigation in central China. *Plos One* 2013;8(9):1-5.  
28  
29  
30  
31  
32  
33  
34  
35  
36  
37  
38  
39  
40  
41  
42  
43  
44  
45



- 1  
2  
3  
4  
5  
6  
7 50. Han JF, Li XH. An analysis on the job stressors of community health nurses. Chinese Nursing Management.  
8  
9 2007;7(5):45-48. (in Chinese )  
10  
11 51. Hou ZH, Meng QY, Yuan BB et al. Motivation preferences of general practices in rural China. Chinese Journal of  
12  
13 Health Policy, 2010;13(10):18-22.  
14  
15  
16  
17 52. Lephalala RP. Factors influencing nurses job satisfaction in selected private hospitals in England. Curationis 2008;31(3):  
18  
19 60–69.  
20  
21  
22 53. Becchetti L, Castriota S, Tortia EC. Productivity, wages and intrinsic motivations. Sma Bus Eco 2012;41:379–399.  
23  
24  
25 54. Frey BS. On the relationship between intrinsic and extrinsic work motivation. Int J Ind Organ 1997;15(4),427-439.  
26  
27  
28 55. Qu JW. Investigation and research on job stress and degree of loyalty in community health workers in Liaoning  
29  
30 Province (M). Shenyang: Chinese Medical University 2013.  
31  
32  
33 56. Malik AA, Yamamoto SS, Souares A, et al. Motivational determinants among physicians in Lahore Pakistan. BMC  
34  
35 Health Serv Res 2010;10:201.  
36  
37  
38 57. David PH, Srinika DJ. Gender differences in work stress among clinical social workers. J Soc Serv Res 2008;10:18.  
39  
40  
41  
42  
43  
44  
45

Table 1 Facets of work stress and work motivation by socio-economic and demographic status for respondents

|                               |     |      | Work stress        |                    |                    |                         | Work motivation                      |             |                    |                |         |
|-------------------------------|-----|------|--------------------|--------------------|--------------------|-------------------------|--------------------------------------|-------------|--------------------|----------------|---------|
|                               | N   | %    | work task and role | career development | wages and benefits | Workplace relationships | organizational structure and climate | recognition | career development | responsibility | Finance |
| <b>Occupation</b>             |     |      |                    |                    |                    |                         |                                      |             |                    |                |         |
| General practitioner          | 335 | 36.0 | 3.53               | 3.17               | 3.78               | 2.90                    | 3.14                                 | 3.61        | 4.20               | 3.44           | 4.15    |
| Public health physician       | 178 | 19.1 | 3.20               | 2.89               | 3.70               | 2.63                    | 2.96                                 | 3.57        | 4.11               | 3.67           | 4.06    |
| Nurse                         | 267 | 28.8 | 3.24               | 2.95               | 3.54               | 2.76                    | 2.78                                 | 3.53        | 4.05               | 3.39           | 4.01    |
| Other                         | 150 | 16.1 | 3.09               | 2.79               | 3.45               | 2.65                    | 2.84                                 | 3.59        | 4.11               | 3.40           | 4.03    |
| F                             |     |      | 6.91**             | 4.97**             | 3.45**             | 3.05**                  | 6.25**                               | 0.66        | 2.31*              | 1.96           | 0.99    |
| <b>Sex</b>                    |     |      |                    |                    |                    |                         |                                      |             |                    |                |         |
| Male                          | 236 | 25.4 | 3.44               | 3.10               | 3.77               | 2.88                    | 3.12                                 | 3.71        | 4.18               | 3.50           | 4.19    |
| Female                        | 694 | 74.6 | 3.27               | 2.93               | 3.56               | 2.72                    | 2.85                                 | 3.56        | 4.12               | 3.43           | 4.03    |
| F                             |     |      | 2.50*              | 2.27*              | 2.60*              | 2.51*                   | 4.09*                                | 2.36*       | 1.23               | 1.04           | 2.39*   |
| <b>Educational background</b> |     |      |                    |                    |                    |                         |                                      |             |                    |                |         |
| High school or below          | 110 | 11.8 | 3.18               | 2.90               | 3.36               | 2.81                    | 2.72                                 | 3.57        | 4.13               | 3.42           | 4.05    |
| Junior college                | 446 | 48.0 | 3.28               | 2.94               | 3.61               | 2.74                    | 2.86                                 | 3.57        | 4.14               | 3.49           | 4.02    |
| College and above             | 374 | 40.2 | 3.36               | 3.00               | 3.65               | 2.73                    | 3.16                                 | 3.60        | 4.11               | 3.39           | 4.11    |
| F                             |     |      | 2.30               | 0.66               | 4.21*              | 0.45                    | 4.02*                                | 0.13        | 0.24               | 1.53           | 1.33    |
| <b>Age in years</b>           |     |      |                    |                    |                    |                         |                                      |             |                    |                |         |
| <25                           | 78  | 8.4  | 3.08               | 2.81               | 3.45               | 2.60                    | 2.77                                 | 3.80        | 4.23               | 3.60           | 3.92    |
| 25-34                         | 258 | 27.7 | 3.21               | 2.94               | 3.63               | 2.72                    | 2.91                                 | 3.65        | 4.11               | 3.48           | 4.17    |

|                                 |     |      |        |      |       |       |       |       |      |       |      |
|---------------------------------|-----|------|--------|------|-------|-------|-------|-------|------|-------|------|
| <b>35-44</b>                    | 329 | 35.4 | 3.36   | 2.98 | 3.55  | 2.78  | 2.88  | 3.52  | 4.13 | 3.35  | 4.03 |
| <b>45-54</b>                    | 234 | 25.2 | 3.43   | 3.02 | 3.69  | 2.79  | 2.94  | 3.53  | 4.13 | 3.51  | 4.04 |
| <b>≥55</b>                      | 31  | 3.3  | 3.12   | 2.88 | 3.54  | 2.71  | 2.93  | 3.48  | 3.98 | 3.28  | 3.91 |
| <b>F</b>                        |     |      | 4.71** | 1.01 | 1.36  | 1.12  | 0.83  | 2.89* | 1.83 | 2.86* | 2.39 |
| <b>Title</b>                    |     |      |        |      |       |       |       |       |      |       |      |
| <b>Senior title</b>             | 42  | 4.5  | 3.12   | 3.11 | 3.38  | 2.69  | 2.73  | 3.37  | 3.97 | 3.55  | 3.96 |
| <b>Vice-senior title</b>        | 131 | 14.1 | 3.32   | 2.92 | 3.65  | 2.63  | 2.93  | 3.46  | 4.05 | 3.25  | 4.03 |
| <b>Middle title</b>             | 399 | 42.9 | 3.43   | 3.03 | 3.69  | 2.85  | 2.94  | 3.56  | 4.16 | 3.44  | 4.06 |
| <b>Primary title</b>            | 299 | 32.2 | 3.20   | 2.93 | 3.54  | 2.72  | 2.87  | 3.62  | 4.12 | 3.49  | 4.08 |
| <b>No title</b>                 | 59  | 6.3  | 3.23   | 2.86 | 3.48  | 2.58  | 2.89  | 3.73  | 4.16 | 3.49  | 4.04 |
| <b>F</b>                        |     |      | 3.96** | 1.07 | 1.71  | 3.04* | 0.59  | 1.73  | 0.98 | 2.13  | 0.16 |
| <b>Monthly income (RMB)</b>     |     |      |        |      |       |       |       |       |      |       |      |
| <b>&lt;2000</b>                 | 361 | 38.9 | 3.24   | 2.95 | 3.69  | 2.76  | 2.90  | 3.61  | 4.15 | 3.49  | 4.09 |
| <b>2000-2999</b>                | 386 | 41.5 | 3.32   | 2.96 | 3.61  | 2.75  | 2.88  | 3.59  | 4.13 | 3.40  | 4.06 |
| <b>3000-3999</b>                | 139 | 14.9 | 3.43   | 2.97 | 3.44  | 2.68  | 2.96  | 3.52  | 4.02 | 3.43  | 3.97 |
| <b>≥4000</b>                    | 44  | 4.7  | 3.39   | 3.03 | 3.21  | 2.93  | 2.78  | 3.44  | 4.27 | 3.53  | 4.28 |
| <b>F</b>                        |     |      | 2.11   | 0.99 | 3.14* | 2.11  | 0.99  | 0.54  | 1.87 | 0.86  | 1.36 |
| <b>Working hours (per week)</b> |     |      |        |      |       |       |       |       |      |       |      |
| <b>&lt;40 小时</b>                | 110 | 11.8 | 3.27   | 2.82 | 3.52  | 2.82  | 2.94  | 2.96  | 4.14 | 3.56  | 3.91 |
| <b>40-47 小时</b>                 | 509 | 54.7 | 3.26   | 2.73 | 3.59  | 2.73  | 2.95  | 2.87  | 4.10 | 3.42  | 4.06 |
| <b>48-55 小时</b>                 | 250 | 26.9 | 3.36   | 2.71 | 3.62  | 2.71  | 2.93  | 2.89  | 4.19 | 3.46  | 4.12 |
| <b>≥56 小时</b>                   | 61  | 6.6  | 3.52   | 2.93 | 3.75  | 2.93  | 3.36  | 3.13  | 4.16 | 3.43  | 4.14 |
| <b>F</b>                        |     |      | 0.06   | 0.20 | 0.48  | 0.20  | 0.01* | 0.11  | 0.39 | 0.44  | 0.13 |

\*p&lt;0.05 \*\*p&lt;0.01

**Table 2 Mean scores of the overall perception and subscales of work stress and work motivation in respect to the level of job satisfaction**

|                                                         | Mean $\pm$ SD<br>Total (n=930) | Level of job satisfaction   |                                | P       |
|---------------------------------------------------------|--------------------------------|-----------------------------|--------------------------------|---------|
|                                                         |                                | Satisfied<br>(n=570, 61.3%) | Dissatisfied<br>(n=360, 38.7%) |         |
| <b>Work stress</b>                                      |                                |                             |                                |         |
| <b>Overall perception*</b>                              | 3.11 $\pm$ 0.68                | 2.95 $\pm$ 0.68             | 3.37 $\pm$ 0.60                | P=0.000 |
| <b>work task and role<sup>¶</sup></b>                   | 3.31 $\pm$ 0.81                | 3.18 $\pm$ 0.82             | 3.52 $\pm$ 0.76                | P=0.000 |
| <b>career development<sup>¶</sup></b>                   | 2.96 $\pm$ 0.87                | 2.79 $\pm$ 0.85             | 3.22 $\pm$ 0.83                | P=0.000 |
| <b>Wages and benefits<sup>¶</sup></b>                   | 3.60 $\pm$ 0.95                | 3.38 $\pm$ 0.94             | 3.95 $\pm$ 0.85                | P=0.000 |
| <b>Workplace relationships<sup>¶</sup></b>              | 2.75 $\pm$ 0.79                | 2.61 $\pm$ 0.79             | 2.96 $\pm$ 0.74                | P=0.000 |
| <b>organizational structure and climate<sup>¶</sup></b> | 2.90 $\pm$ 0.79                | 2.74 $\pm$ 0.79             | 3.15 $\pm$ 0.71                | P=0.000 |
| <b>Work motivation</b>                                  |                                |                             |                                |         |
| <b>Overall perception<sup>°</sup></b>                   | 3.80 $\pm$ 0.55                | 3.86 $\pm$ 0.55             | 3.70 $\pm$ 0.55                | P=0.000 |
| <b>Career development<sup>†</sup></b>                   | 4.13 $\pm$ 0.57                | 4.24 $\pm$ 0.51             | 3.95 $\pm$ 0.62                | P=0.000 |
| <b>Recognition<sup>†</sup></b>                          | 3.58 $\pm$ 0.77                | 3.66 $\pm$ 0.77             | 3.45 $\pm$ 0.77                | P=0.000 |
| <b>Responsibility<sup>†</sup></b>                       | 3.45 $\pm$ 0.77                | 3.53 $\pm$ 0.77             | 3.32 $\pm$ 0.77                | P=0.000 |
| <b>Financial<sup>†</sup></b>                            | 4.06 $\pm$ 0.79                | 4.02 $\pm$ 0.79             | 4.12 $\pm$ 0.80                | P=0.295 |

\* Mean score of overall perception of work stress was calculated for each respondent by adding the value of each item of work stress and then divided by the numbers of all item.

° Mean score of overall perception of work motivation was calculated for each respondent by adding the value of each item of work motivation and then divided by the numbers of the item.

¶ Mean score of each subscale of work stress was calculated for each respondent by adding the value of each item belongs to the subscale of work stress and then divided by the numbers of the item.

† Mean score of each subscale of work motivation was calculated for each respondent by adding the value of each item belongs to the subscale of work motivation and then divided by the numbers of the item.

Table 3 The logistic regression analysis for job satisfaction\*

|                                                                     |                                      | Odds Ratio | 95% CI     |
|---------------------------------------------------------------------|--------------------------------------|------------|------------|
| <b>Occupation</b><br>(Reference : nurse)                            | General practitioner                 | 0.56**     | 0.38-0.81  |
|                                                                     | Public health physician              | 0.42*      | 0.20-0.87  |
|                                                                     | Other technical staff                | 1.89*      | 1.04-3.44  |
| <b>Sex</b><br>(Reference : male)                                    | Female                               | 1.27       | 0.83-1.95  |
| <b>Educational background</b><br>(Reference : High school or below) | Junior college                       | 0.76       | 0.43-1.34  |
|                                                                     | College and above                    | 0.75       | 0.41-1.40  |
| <b>Age in years</b><br>(Reference : <25)                            | 25-34                                | 0.60       | 0.30-1.21  |
|                                                                     | 35-44                                | 1.10       | 0.51-2.42  |
|                                                                     | 45-54                                | 1.04       | 0.45-2.35  |
|                                                                     | ≥55                                  | 8.53**     | 1.86-39.01 |
| <b>Title</b><br>(Reference : senior title)                          | Vice-senior title                    | 1.86       | 0.476-7.29 |
|                                                                     | Middle title                         | 2.57       | 0.67-9.78  |
|                                                                     | Primary title                        | 3.84       | 0.96-15.39 |
|                                                                     | No title                             | 7.02*      | 1.53-32.12 |
| <b>Monthly income in RMB</b><br>(Reference : <2000)                 | 2000-2999                            | 0.50       | 0.26-0.98  |
|                                                                     | 3000-3999                            | 0.99       | 0.64-1.52  |
|                                                                     | ≥4000                                | 1.30       | 0.86-1.97  |
| <b>Weekly hours worked</b><br>(Reference : <40)                     | 40-47                                | 0.90       | 0.59-1.37  |
|                                                                     | 48-55                                | 1.07       | 0.67-1.70  |
|                                                                     | ≥56                                  | 1.20       | 0.62-2.33  |
| <b>Work stress</b>                                                  | work task and role                   | 0.98       | 0.74-1.300 |
|                                                                     | career development                   | 0.68*      | 0.49-0.94  |
|                                                                     | wages and benefits                   | 0.63**     | 0.50-0.79  |
|                                                                     | Workplace relationships              | 0.80       | 0.59-1.09  |
|                                                                     | Organizational structure and climate | 0.97       | 0.71-1.33  |
| <b>Work motivation</b>                                              | Career development                   | 1.13       | 0.85-1.505 |
|                                                                     | Recognition                          | 2.86**     | 2.02-4.04  |
|                                                                     | Responsibility                       | 1.36*      | 1.02-1.81  |
|                                                                     | Finance                              | 0.72**     | 0.56-0.92  |

\*Strongly satisfied and satisfied coded as 1 vs. strongly dissatisfied and dissatisfied coded as 0.

\*p<0.05, \*\*p<0.01

1  
2  
3  
4  
5  
6  
7  
8  
9  
10  
11  
12  
13  
14  
15  
16  
17  
18  
19  
20  
21  
22  
23  
24  
25  
26  
27  
28  
29  
30  
31  
32  
33  
34  
35  
36  
37  
38  
39  
40  
41  
42  
43  
44  
45  
46  
47  
48  
49  
50  
51  
52  
53  
54  
55  
56  
57  
58  
59  
60

For peer review only

1  
2  
3  
4  
5  
6  
7  
8  
9  
10  
11  
12  
13  
14  
15  
16  
17  
18  
19  
20  
21  
22  
23  
24  
25  
26  
27  
28  
29  
30  
31  
32  
33  
34  
35  
36  
37  
38  
39  
40  
41  
42  
43  
44  
45  
46  
47  
48  
49  
50  
51  
52  
53  
54  
55  
56  
57  
58  
59  
60

**Work stress, work motivation and their effects on job  
satisfaction for community health workers: A cross-sectional  
survey in China**

Li Li\*<sup>1</sup>, Hongyan Hu<sup>2</sup>, Hao Zhou<sup>3</sup>, Changzhi He<sup>1</sup>, Lihua Fan<sup>1</sup>, Xinyan  
Liu<sup>1</sup>, Zhong Zhang, Heng Li<sup>1</sup>, Tao Sun<sup>1</sup>

<sup>1</sup> Department of Health Management, School of Public Health, Harbin  
Medical University, Harbin, China

<sup>2</sup> Research Service Office, The Second Affiliated Hospital, Harbin  
Medical University, Harbin, China

<sup>3</sup> Department of Emergency, Center for Disease Control and Prevention,  
Harbin, China

**Correspondence to** Li Li: [lilihmu@gmail.com](mailto:lilihmu@gmail.com)

**Abstract**

**Objective:** It is well documented that both work stress and work  
motivation are key determinants of job satisfaction. The aim of this study  
was to examine levels of work stress and motivation and their  
contribution to job satisfaction among community health workers in  
Heilongjiang Province, China.

**Design:** Cross-sectional survey.

**Setting:** Heilongjiang Province, China.

**Participants:** The participants were 930 community health workers from

1  
2  
3  
4 six cities in Heilongjiang province.

5  
6 **Primary and secondary outcome measures:** Multistage sampling  
7  
8 procedures were used to measure socioeconomic and demographic status,  
9  
10 work stress, work motivation, and job satisfaction. Logistic regression  
11  
12 analysis was performed to assess key determinants of job satisfaction.  
13  
14

15  
16 **Results:** There were significant differences in some subscales of work  
17  
18 stress and work motivation by some of socioeconomic characteristics.  
19  
20 Levels of overall stress perception and scores on all five work stress  
21  
22 subscales were higher in dissatisfied workers relative to satisfied workers.  
23  
24 However, levels of overall motivation perception and scores on the career  
25  
26 development, responsibility, and recognition motivation subscales were  
27  
28 higher in satisfied respondents relative to dissatisfied respondents. The  
29  
30 main determinants of job satisfaction were occupation; age; title; income;  
31  
32 the career development, and wages and benefits subscales of work stress;  
33  
34 the recognition, responsibility and financial subscales of work motivation.  
35  
36

37  
38  
39  
40  
41 **Conclusion:** The findings indicated considerable room for improvement  
42  
43 in job satisfaction among community health workers of Heilongjiang  
44  
45 Province in China. Health care managers and policymakers should take  
46  
47 both work stress and motivation into consideration, as two subscales of  
48  
49 work stress and one subscale of work motivation negatively influenced  
50  
51 job satisfaction and two subscales of work motivation positively  
52  
53 influenced job satisfaction.  
54  
55  
56  
57  
58  
59  
60



1  
2  
3  
4 **Keywords:** work stress; work motivation; job satisfaction; community  
5  
6 health service  
7

## 8 **ARTICLE SUMMARY**

### 9 **Article focus**

- 10  
11  
12  
13  
14 ▪How do the overall perception and subscales of work stress and  
15  
16 motivation relate to levels of job satisfaction?  
17  
18  
19 ▪Which facets of work stress and motivation are affected by  
20  
21 socioeconomic and demographic status?  
22  
23  
24 ▪How do work stress and motivation influence job satisfaction among  
25  
26 community health workers?  
27

28  
29 **Key message** There is considerable room for improvement in job  
30  
31 satisfaction among community health workers, and health care managers  
32  
33 and policymakers should take both work stress and motivation into  
34  
35 consideration.  
36  
37

### 38 **Strengths and limitations of this study**

39  
40  
41 This study is one of the first of its kind to examine the combined effects  
42  
43 of work stress and work motivation on job satisfaction among urban  
44  
45 community health workers in China since the implementation of new  
46  
47 health system reform. However, the instrument used in this study is not  
48  
49 a commonly used international scale, there may be an inherent bias in  
50  
51 self-report measures, and the small sample may limit the generalizability  
52  
53 of the research findings.  
54  
55  
56  
57  
58  
59  
60

## INTRODUCTION

As the foundation of the three-tier health system in China, community health service institutions played a very important role in improving access to health care service, enhancing equity and improving health.<sup>1-2</sup>

In 2009, the Chinese central government promulgated a new set of health system reforms and called for the development of community health services. The state established basic public health service goals, which focused on providing health education, chronic disease management, and disease prevention services for urban and rural residents. From 2009 to 2012, the number of community health service institutions increased by 6,254 and the number of visits increased by 193,949 million. Therefore, community health centers and workers thereof, are very important in the process of health system reform.

Heilongjiang Province is located in Northeast China with population of about 38.1 million. There were 410 urban community health centers (CHCs) and 366 community health stations with 13,100 health workers as of December 31, 2012.<sup>3</sup> On average, there were 23 and 10 medical personnel in each community health center and community health station, respectively. Since the introduction of CHCs, difficulties concerning limited resources and insufficient and poorly trained staff have been present. There were 5,416 practitioners (including assistant practitioners) in community health institutions in Heilongjiang province.<sup>3</sup> Based on the

1  
2  
3  
4 province population and human resource planning ratios, there is an  
5  
6 approximate shortfall of 30% in the number of general practitioners  
7  
8 (5,416 vs. 7,620) in 2012.<sup>4</sup> In addition, recent reforms have expanded  
9  
10 the scope of public health services and increased workload without  
11  
12 equivalent increases in staffing.<sup>5,6</sup>  
13  
14

15  
16 In some CHCs, general practitioners, public health physicians, and  
17  
18 nurses have been working in teams, providing medical and basic public  
19  
20 health services to community residents, both in the centers and during  
21  
22 home visits. With a late start, many of these practitioners were initially  
23  
24 hospital-based specialists, and majority of public health physicians did  
25  
26 not have a public health background. To improve skills and knowledge,  
27  
28 continuing medical education was compulsory and no fewer than 25  
29  
30 credit points were required per year. Other challenges found in the CHCs  
31  
32 were lower wages and fewer title promotion opportunities relative to  
33  
34 general hospitals. Limited resources and a shortage of skilled health  
35  
36 workers created very tight bottlenecks in the provision of services, which  
37  
38 led to many community health workers experiencing work-related stress  
39  
40 and low motivation for work, in addition to receiving low salaries and  
41  
42 restricted opportunities for promotion.<sup>7-8</sup> Many studies have shown that  
43  
44 work stress and work motivation can greatly affect job satisfaction and, in  
45  
46 turn, the quality and delivery of health care. However, few studies have  
47  
48 focused on work stress and motivation and their effects on job  
49  
50  
51  
52  
53  
54  
55  
56  
57  
58  
59  
60

1  
2  
3  
4 satisfaction among Chinese community health workers since the  
5  
6 implementation of the new health system reform policy.  
7

8  
9 Work stress is of great concern to managers, employees, and other  
10  
11 stakeholders in organizations. It is a complex phenomenon and has a  
12  
13 multitude of definitions in a variety of theoretical models.<sup>9</sup> According to  
14  
15 Lazarus and Folkman's cognitive theory of stress and coping, work stress  
16  
17 was defined as the interaction between the individual and the  
18  
19 environment.<sup>10</sup> This theory suggested that when demands from the  
20  
21 environment exceed the available resources, the result was either stress or  
22  
23 coping, depending on the individual's appraisal of the stressors. Karasek's  
24  
25 demand-control model assumed that psychological strain resulted from  
26  
27 the joint effects of work demands and the degree of decision-making  
28  
29 freedom available to workers facing the demands.<sup>11</sup> The effort-reward  
30  
31 imbalance model proposed that work stress resulted from a mismatch  
32  
33 between high commitment and effort at work and low rewards, including  
34  
35 salary, recognition, and career promotion.<sup>12</sup> Nakasis and Ouzouni defined  
36  
37 work stress as the harmful physical and emotional responses that occur  
38  
39 when job requirements do not match workers' capabilities, resources, and  
40  
41 needs.<sup>13</sup> In general, a greater imbalance between demands and individual  
42  
43 abilities will result in greater stress.<sup>14</sup> Riggio classified work stress into  
44  
45 work task stress and work role stress.<sup>15</sup> Cooper and Marshall's model of  
46  
47 job stress proposed that intrinsic requirements of the job, role within the  
48  
49  
50  
51  
52  
53  
54  
55  
56  
57  
58  
59  
60

1  
2  
3  
4 organization, career development, organizational structure and climate,  
5  
6 and relationships at work constituted the domain of work-related stress  
7  
8 within an organization.<sup>16</sup> In our study, five subscales of work stress were  
9  
10 named based on this model. Existing research has identified heavy  
11  
12 workload, insufficient resources, work relations, lack of professional  
13  
14 respect, and lack of promotion opportunities as possibly the most salient  
15  
16 work stressors for community health workers.<sup>17-19</sup> Long-term stress may  
17  
18 not only be harmful to the health workers themselves but may also affect  
19  
20 community health service centers through employee dissatisfaction,  
21  
22 burnout, poor performance, or turnover intention.<sup>20,21-24</sup> Therefore, it is  
23  
24 important to reduce work stress.  
25  
26  
27  
28  
29  
30

31 Work motivation can be defined as the degree of an individual's  
32  
33 willingness to exert and maintain an effort towards attaining  
34  
35 organizational goals.<sup>25</sup> It reflected the interactions between workers and  
36  
37 their work environments. Nahavandi and Malekzadeh believed that  
38  
39 motivation represented a stable mind, aspiration, or interest within the  
40  
41 individual and can translate into action.<sup>26</sup> Motivation theory examined the  
42  
43 process of motivation and explained why people at work behave the way  
44  
45 they do in terms of efforts. Building on Vroom's expectancy-valence  
46  
47 theory of motivation, Porter and Lawler proposed a model of intrinsic and  
48  
49 extrinsic work motivation.<sup>27,28</sup> This model suggested that intrinsic and  
50  
51 extrinsic rewards were additive, and accounted for total job satisfaction.  
52  
53  
54  
55  
56  
57  
58  
59  
60

1  
2  
3  
4  
5  
6  
7  
8  
9  
10  
11  
12  
13  
14  
15  
16  
17  
18  
19  
20  
21  
22  
23  
24  
25  
26  
27  
28  
29  
30  
31  
32  
33  
34  
35  
36  
37  
38  
39  
40  
41  
42  
43  
44  
45  
46  
47  
48  
49  
50  
51  
52  
53  
54  
55  
56  
57  
58  
59  
60

Intrinsic motivation refers to doing something for the inherent satisfaction involved and is highly autonomous (i.e., self-regulated). In contrast, extrinsic motivation means doing something in order to obtain a separable outcome (i.e. tangible or verbal rewards ).<sup>29,30</sup> Peters identified job content and work environment, extrinsic benefits, autonomy and security, and transparency as factors in work motivation for health workers using factor analysis.<sup>31</sup> Patrick and Wilbroad developed a tool to measure health worker motivation and revealed that organizational commitment, conscientiousness, intrinsic job satisfaction, timeliness and attendance were the major determinants of higher motivation.<sup>32-33</sup> Tribolet explored the relationship between intrinsic and extrinsic motivation.<sup>34</sup> Hoonakker found that nurses appreciated challenges and opportunities for new learning and teamwork.<sup>35</sup> Pool explored the significant positive association between work motivation and job satisfaction, whereas Stringer found that intrinsic motivation was positively associated, and extrinsic motivation negatively associated with job satisfaction.<sup>36-37</sup>

In China, previous studies have reported that poor competency and excessive workload were key work stressors among community health workers.<sup>7,19</sup> Shi suggested that policymakers should focus on training and educational opportunities for primary care workers and consider ways to reduce workload stress and improve salaries. <sup>38</sup> Hung identified professional development, training opportunities, living environment,

1  
2  
3  
4 benefits, and working conditions as the most important motivating factors  
5  
6 for primary care providers in China.<sup>39</sup> Ge analyzed the relationship  
7  
8 between work stress and job satisfaction among Chinese community  
9  
10 health workers and reported that a degree of freedom in decision making  
11  
12 and good workplace relationships were positive predictors of job  
13  
14 satisfaction.<sup>40</sup> Chen investigated relationships between work motivation,  
15  
16 work stress and job satisfaction in cross-strait employees in Taiwan and  
17  
18 mainland China.<sup>41</sup>

19  
20  
21 The present study focused on the major factors affecting work stress  
22  
23 and motivation identified in previous research and provided an overview  
24  
25 of community health workers' perspectives of work stress and motivation  
26  
27 factors.<sup>16, 42-44</sup> The purpose of this study was to assess the predictors of  
28  
29 job satisfaction among community health workers in one Chinese  
30  
31 province. A cross-sectional survey was conducted to measure levels of  
32  
33 work stress, work motivation and job satisfaction. The key predictors of  
34  
35 job satisfaction for community health workers were assessed with special  
36  
37 attention devoted to work stress and motivation.  
38  
39  
40  
41  
42  
43  
44  
45  
46  
47  
48

## 49 METHODS

### 50 Sample

51  
52 A cross-sectional survey of community health workers was conducted  
53  
54 from March 1 to October 31, 2013 in Heilongjiang Province, China.  
55  
56  
57  
58  
59  
60

1  
2  
3  
4 Based on the literature about community health services in China, a  
5  
6 multi-stage, stratified sampling design was employed to ensure that study  
7  
8 data were provincially representative.<sup>7,40</sup> First, six cities (Harbin,  
9  
10 Qiqihar, Suihua, Jiamusi, Qitaihe, and Heihe) were selected based on  
11  
12 GDP figures and three levels of the development of the community health  
13  
14 service. Second, 15 community health centers were randomly selected  
15  
16 from each city. On average, there were 22 medical personnel in each of  
17  
18 the selected community health centers. Third, 60% of general  
19  
20 practitioners, public health physicians, nurses and other health technical  
21  
22 staff in each center were chosen randomly, with the exception of those  
23  
24 who were absent. The research team invited all the selected staff  
25  
26 members to participate in the study. The questionnaire included a cover  
27  
28 page explaining the purposes and procedures of the study. The data were  
29  
30 collected anonymously and the respondents completed the survey  
31  
32 questionnaires privately to ensure confidentiality. Respondents were  
33  
34 assured that participation in the survey was voluntary, and the return of  
35  
36 questionnaires represented informed consent. The research staff stayed at  
37  
38 the community health center and answered respondents' questions during  
39  
40 the process of survey completion. Respondents were able to choose the  
41  
42 best time to complete the questionnaire, such as when they were not busy  
43  
44 or their offices were quiet. Most completed questionnaires were collected  
45  
46 on site by the investigator on the day of the visit. If some respondents did  
47  
48  
49  
50  
51  
52  
53  
54  
55  
56  
57  
58  
59  
60



1  
2  
3  
4 not finish that day, investigators set a date to retrieve the questionnaires.  
5  
6 Respondents were asked to seal the completed questionnaires into  
7  
8 individual envelopes provided by the research team. The questionnaire  
9  
10 was relatively brief and no private personal information was collected.  
11  
12  
13 There were 980 questionnaires delivered to community health workers,  
14  
15 all of which were returned. However, 50 (5.1%) were incomplete or even  
16  
17 blank, which left 930 valid questionnaires. This study was approved by  
18  
19 Medical Ethic Committee of Harbin Medical University.  
20  
21  
22  
23  
24  
25

### 26 **Assessment tools**

27  
28  
29 In the present study, Porter and Lawler's intrinsic and extrinsic  
30  
31 motivation model, and Vroom's expectancy-valence motivation theory  
32  
33 were used to analyze the relationship between work motivation and job  
34  
35 satisfaction. Lazarus and Folkman's cognitive theory of stress and  
36  
37 coping, and Karasek's demand-control model were used to analyze the  
38  
39 relationship between work stress and job satisfaction.<sup>10-11</sup>  
40  
41  
42  
43

44 The study instrument was part of a self-administered questionnaire  
45  
46 composed of four sections. Section 1 focused on respondents'  
47  
48 socioeconomic and demographic status.  
49  
50

51 Section 2 assessed work stress. Thirty items related to work stress  
52  
53 were developed through intensive qualitative interviews with  
54  
55 policymakers, health care managers and community health workers, a  
56  
57  
58  
59  
60

1  
2  
3  
4 review of the literature, and an initial pilot study.<sup>16,42</sup> Then factor analysis,  
5  
6 which was not discussed in this paper, yielded a five-subscale structure  
7  
8 that comprised a total of 26 items. The five-subscale solution accounted  
9  
10 for 69.43% of the overall variance, and was found to be internally  
11  
12 consistent (overall Cronbach's  $\alpha=0.87$ ). Based on Cooper and Marshall's  
13  
14 model of job stress, these five subscales of work stress were named work  
15  
16 task and role, career development, wages and benefits, workplace  
17  
18 relationships, and organizational structure and climate stress.<sup>16</sup> They  
19  
20 individually accounted for 16.05%, 25.10%, 12.00%, 9.08% and 7.20%  
21  
22 of the overall variance, respectively, and the Cronbach's Alpha within  
23  
24 individual subscale ranged from 0.85 to 0.90. Respondents were asked to  
25  
26 rate their perception of work stress on each item based on a 5-point Likert  
27  
28 scale, very less stressful (1), less stressful (2), average (3), stressful (4)  
29  
30 and very stressful (5). The Cronbach's alpha value for this study was  
31  
32 0.87.  
33  
34  
35  
36  
37  
38  
39

40  
41 Section 3 assessed work motivation. Twenty-one items were  
42  
43 developed based on previous research, panel discussions, and an initial  
44  
45 pilot study.<sup>43-45</sup> Then 3 items were deleted and the 18 retained items were  
46  
47 divided into four subscales by factor analysis, which was not discussed in  
48  
49 this paper. The four-subscale solution accounted for 65.10% of the overall  
50  
51 variance, and was found to be internally consistent (overall Cronbach's  
52  
53  $\alpha=0.75$ ). The subscales were renamed based on the conceptual meaning  
54  
55  
56  
57  
58  
59  
60

1  
2  
3  
4 of the items and comprised: career development, recognition,  
5  
6 responsibility, and financial motivation. They individually accounted for  
7  
8 21.20%, 19.40%, 14.60% and 9.90% of the overall variance, and the  
9  
10 Cronbach's Alpha within individual subscale ranged from 0.82 to 0.89.  
11  
12 According to Porter and Lawler's intrinsic and extrinsic motivation  
13  
14 model, we defined career development and financial motivation as  
15  
16 extrinsic motivation, and recognition and responsibility motivation as  
17  
18 intrinsic motivation.<sup>28,44</sup> Respondents were asked to rate their motivation  
19  
20 intensity on each item based on a 5-point Likert scale, very less strong (1),  
21  
22 less strong (2), average (3), strong (4) and very strong (5).  
23  
24  
25  
26  
27  
28

29 Section 4 assessed job satisfaction. In this study, a single-item  
30  
31 measure was used to measure overall job satisfaction.<sup>46</sup> Respondents  
32  
33 were asked to indicate their level of job satisfaction on a 4-point Likert  
34  
35 scale, strongly dissatisfied (1), dissatisfied (2), satisfied (3) and  
36  
37 dissatisfied (4). During the process of data analysis, strongly satisfied and  
38  
39 satisfied were coded as 1, while strongly dissatisfied and dissatisfied were  
40  
41 coded as 0.  
42  
43  
44  
45  
46  
47  
48

### 49 Data analysis

50  
51 Survey results were analyzed using SPSS 17.0. Descriptive analyses  
52  
53 included frequencies and percentages for categorical variables and means  
54  
55 and standard deviations (SDs) for continuous variables. Mean differences  
56  
57  
58  
59  
60

1  
2  
3  
4 were examined using t-tests and ANOVAs for relevant subgroups. We  
5  
6 used logistic regression to measure the key predictors of job satisfaction  
7  
8 because the dependent variable (job satisfaction) was a binary variable,  
9  
10 which made linear regression unsuitable.  
11  
12  
13

## 14 15 16 **RESULTS**

### 17 18 **Socioeconomic and demographic status of respondents**

19  
20 Socioeconomic and demographic status of the sample were shown in  
21  
22 Table 1. A majority of the participants were female (74.6%). General  
23  
24 practitioners accounted for 36% of community health workers surveyed,  
25  
26 followed by nurses (28.8%), public health physician (19.1%). In this  
27  
28 survey, only 18.6% of them had senior professional titles and less than  
29  
30 half (40.2%) of them had bachelor degree or higher. Only 19.6% of them  
31  
32 had monthly incomes of more than 3,000 RMB (where  
33  
34 \$1.00US=6.23RMB in 2012). Nearly ninety percent of respondents  
35  
36 worked more than 40 hours per week.  
37  
38  
39  
40  
41  
42

### 43 44 **Work stress and motivation according to socioeconomic and** 45 46 **demographic factors**

47  
48 Results of variance analysis and further multiple comparison t-tests were  
49  
50 shown in Table 1. There were significant differences in scores for all of  
51  
52 the five subscales of work stress according to occupation ( $p < 0.01$ ) and  
53  
54 gender ( $p < 0.05$ ), with general practitioners and men showing higher  
55  
56  
57  
58  
59  
60

1  
2  
3  
4 levels of work stress.

5  
6 Scores for the wages and benefits subscale of work stress differed  
7  
8 significantly according to educational background ( $p < 0.05$ ) and income  
9  
10 ( $p < 0.05$ ). Mid-level professionals reported significantly higher levels of  
11  
12 stress on the work task and role subscale ( $p < 0.01$ ) and in workplace  
13  
14 relationships ( $p < 0.05$ ). Participants aged 35–44 and 45–54 years  
15  
16 reported significantly higher levels of stress on the work task and role  
17  
18 subscale ( $p < 0.01$ ).  
19  
20  
21  
22

23  
24 The male had significant higher level recognition and financial  
25  
26 motivation ( $p < 0.05$ ). Younger workers ( $< 25$ ) had significantly higher  
27  
28 level of recognition motivation ( $p < 0.05$ ) and responsibility motivation  
29  
30 ( $p < 0.05$ ). A higher level of recognition motivation was expressed by  
31  
32 general practitioners ( $p < 0.05$ ).  
33  
34  
35

36  
37 There were no significant differences in any of the four work  
38  
39 motivation subscale scores according to educational background,  
40  
41 professional title, or income. Men reported significantly higher levels of  
42  
43 recognition and financial motivation ( $p < 0.05$ ). Younger workers ( $< 25$ )  
44  
45 reported significantly higher levels of recognition ( $p < 0.05$ ) and  
46  
47 responsibility motivation ( $p < 0.05$ ). General practitioners reported higher  
48  
49 levels of recognition motivation ( $p < 0.05$ ).  
50  
51  
52  
53  
54  
55

56 **Insert Table 1 here**  
57  
58  
59  
60

### **Levels of work stress, work motivation, and job satisfaction**

The mean score for overall perception of work stress was 3.11, which is slightly higher than the mid-point of 3 (Table 2). Wages and benefits (3.60) subscale of work stress ranked in the highest position, followed by work task and role (3.31), career development (2.96), organizational structure and climate (2.90), and relationships (2.75) ( $F=154.9$ ,  $p<0.001$ ). Statistically significant differences were noted in overall perception of stress and scores on all five work stress subscales between satisfied and dissatisfied respondents; those who were dissatisfied reported higher levels of work stress ( $p < 0.001$ ).

Career development motivation was rated the highest level, followed by financial, recognition and responsibility motivation ( $F=202.6$ ,  $p<0.001$ ). Levels of overall perception of work motivation and all subscales with the exception of financial motivation were significantly different between the satisfied and dissatisfied groups of respondents, and the satisfied workers had higher levels of work motivation ( $p<0.01$ ).

In respect to motivation, career development was rated highest, followed by financial, recognition, and responsibility motivation ( $F = 202.6$ ,  $p < 0.001$ ). Levels of overall perception of motivation and scores on all work motivation subscales, with the exception of financial motivation, differed significantly between the satisfied and dissatisfied

1  
2  
3  
4 respondents, and the satisfied workers reported higher levels of work  
5  
6 motivation ( $p < 0.01$ ).  
7  
8  
9

10  
11 **Insert Table 2 here**  
12

### 13 14 15 **Predictors of job satisfaction** 16

17  
18 In this study, 61.3% of respondents were satisfied with their jobs. Table 3  
19  
20 presented results of a logistic regression model that examined the key  
21  
22 predictors of job satisfaction, with special attention devoted to work  
23  
24 stress and work motivation.  
25  
26  
27

28  
29 Only a few demographic characteristics were predictors of job  
30  
31 satisfaction. We found that when scores on the career development and  
32  
33 wages and benefits subscales of work stress increased by one grade, job  
34  
35 satisfaction decreased by 32% (odds ratio [OR] = 0.68,  $p < 0.05$ ) and  
36  
37 37% (OR = 0.63,  $p < 0.01$ ), respectively. When financial motivation  
38  
39 increased by one grade, job satisfaction decreased by 28% (OR = 0.72,  $p$   
40  
41  $< 0.01$ ), and when recognition motivation and responsibility motivation  
42  
43 increased by one grade, job satisfaction increased 1.86 (OR = 2.86,  $p <$   
44  
45 0.01) and 0.36 times (OR = 1.36,  $p < 0.05$ ), respectively. Compared with  
46  
47 nurses, general practitioners (OR = 0.56,  $p < 0.01$ ) and public health  
48  
49 physicians (OR = 0.42,  $p < 0.05$ ) reported lower job satisfaction, while  
50  
51 other technical staff (OR = 1.89) reported higher job satisfaction. Workers  
52  
53  
54  
55  
56  
57  
58  
59  
60

1  
2  
3  
4 with no title (OR = 7.02,  $p < 0.05$ ) were more satisfied than workers with  
5  
6 a senior title.  
7  
8

9  
10  
11 **Insert Table 3 here**  
12

## 13 14 15 16 **Discussion** 17

18 Job satisfaction in community health workers is important for the  
19 sustainable development of basic healthcare in China, but health  
20 policymakers and managers have neglected it for a long time.<sup>47</sup> This study  
21 was one of the first of its kind to examine the level of work stress and  
22 work motivation and their combined effects on job satisfaction among  
23 urban community health workers in China since the implementation of  
24 new health system reform.  
25  
26  
27  
28  
29  
30  
31  
32  
33  
34

35  
36 Results indicated that the wages and benefits subscale of stress  
37 ranked highest, followed by the work task and role subscale. Similarly,  
38 previous research related to work stress found that low salary, heavy  
39 workload, and few promotion opportunities were the most frequently  
40 cited workplace stressors.<sup>49,50</sup> Several reasons may have contributed to  
41 these findings. In Heilongjiang Province, the average annual income of  
42 health service personnel in urban hospitals was 52,564 RMB (\$1.00US =  
43 6.23RMB) in 2012. In this study, 80.4% of the respondents' annual  
44 incomes were lower than 36,000 RMB. These low salaries for community  
45  
46  
47  
48  
49  
50  
51  
52  
53  
54  
55  
56  
57  
58  
59  
60



1  
2  
3  
4 health workers increased their wages and benefits stress.<sup>48</sup> In the  
5  
6 meanwhile, based on the province population and human resource  
7  
8 planning ratios, there is an approximate shortfall of 30% in the number of  
9  
10 general practitioners in 2012.<sup>4</sup> And the recent reforms have expanded  
11  
12 the scope of public health services and increased workload without  
13  
14 equivalent increases in staffing.<sup>5,6</sup>  
15  
16  
17  
18

19  
20 Unfortunately, the present study found that scores on the career  
21  
22 development, and wages and benefits subscales of work stress were  
23  
24 negatively associated with job satisfaction. These findings were  
25  
26 consistent with previous studies in which workers were likely to report  
27  
28 low job satisfaction if they did not receive promotion and advancement  
29  
30 opportunities or adequate salaries.<sup>22,33,52</sup>  
31  
32  
33

34  
35 With regard to work motivation, results showed the career  
36  
37 development and financial subscales of work motivation ranked first and  
38  
39 second respectively. Consistent with Hung and Hou's study, which found  
40  
41 income, benefits, and professional development were the most important  
42  
43 motivating factors among community health workers in China.<sup>39,51</sup>  
44  
45

46  
47 In this study, we defined career development and financial  
48  
49 motivation as extrinsic motivation and recognition and responsibility  
50  
51 motivation as intrinsic motivation based on the literature.<sup>37,53</sup> Results  
52  
53 reported that the recognition and responsibility subscales of work  
54  
55 motivation were positive predictors of job satisfaction, and financial  
56  
57  
58  
59  
60

1  
2  
3  
4 motivation was a negative predictor. This was consistent with the  
5  
6 “crowding-in” effect, which proposes that intrinsic motivation increases  
7  
8 job satisfaction, whereas extrinsic motivation decreases job satisfaction.<sup>54</sup>  
9  
10  
11 It should be noted that in this study, the level of extrinsic motivation was  
12  
13 higher than that of intrinsic motivation.  
14

15  
16 These findings have significant implications for managers of  
17  
18 community health centers and policymakers in their efforts to improve  
19  
20 workers’ job satisfaction. First, policymakers should take measures to  
21  
22 improve community health workers’ salaries. In China, basic public  
23  
24 health services are funded by the government and provided by  
25  
26 community health workers without cost to residents. If health workers are  
27  
28 dissatisfied with their salaries, they may prefer to work for profit-making  
29  
30 medical services instead of nonprofit public health services. In the  
31  
32 meanwhile, managers should implement appropriate performance salary  
33  
34 distribution system to arouse the enthusiasms of the staff and reduce their  
35  
36 financial stress. Second, policymakers should focus on appropriate  
37  
38 promotion policies for community health workers. At present, it was  
39  
40 difficult for community health workers to get title promotion, for there  
41  
42 were limit promotion quotas for CHCs every year in Heilongjiang  
43  
44 Province and our study found only 18.6% of respondents had senior  
45  
46 professional title. Third, the managers should provide and support their  
47  
48 workers to attend training or continuing education. Fourth, managers and  
49  
50  
51  
52  
53  
54  
55  
56  
57  
58  
59  
60

1  
2  
3  
4 policymakers should take measures to inspire intrinsic motivation in  
5  
6 workers. Becchetti proposed that when workers do not work for financial  
7  
8 incentives, they may find satisfaction irrespective of their salaries, even if  
9  
10 the financial incentive is kept to a minimum, and may therefore be  
11  
12 satisfied with their jobs.<sup>53</sup> **Therefore, managers and policymakers should**  
13  
14 **introduce more incentives to encourage community health workers to**  
15  
16 **work for responsibility or recognition.**  
17  
18  
19

20  
21 As some subscales of work stress and work motivation can influence  
22  
23 job satisfaction either positively or negatively, we examined levels of  
24  
25 work stress and motivation according to demographic characteristics and  
26  
27 found that policymakers and managers should pay more attention to three  
28  
29 types of workers. The first group of workers included those aged between  
30  
31 35 and 54 years (35–44 and 45–54 age groups), who reported higher  
32  
33 levels of stress on the work task and role subscale and lower levels of  
34  
35 intrinsic motivation. **Similar results have been reported; in Qu's study,**  
36  
37 **community health workers in mid-level age groups were significantly**  
38  
39 **more stressed than those in the youngest age group in one province of**  
40  
41 **China.**<sup>55</sup> This could be related to workload or difficulty and complexity of  
42  
43 the work task, which is usually greater for 35- to 54-year-old workers, as  
44  
45 they are the backbone of community health services. Men form the  
46  
47 second group that requires attention. In our study, men's scores on all of  
48  
49 the work stress subscales tended to be higher than women's, and men  
50  
51  
52  
53  
54  
55  
56  
57  
58  
59  
60

1  
2  
3 reported higher levels of financial motivation.<sup>56</sup> However, another  
4 Chinese study of primary health workers found no differences in financial  
5 motivation.<sup>51</sup> David found that women reported more stress in the  
6 financial rewards and role ambiguity subscales.<sup>57</sup> The final group of  
7 workers identified as requiring attention consists of general practitioners,  
8 who experienced the highest stress according to all five work stress  
9 subscales and reported the highest career development motivation.  
10 General practitioners in community health centers face more difficult and  
11 complicated tasks and types of medical risk than other health care  
12 workers do, and they receive lower salaries and fewer promotion  
13 opportunities than their counterparts in general hospitals.  
14  
15  
16  
17  
18  
19  
20  
21  
22  
23  
24  
25  
26  
27  
28  
29  
30  
31  
32  
33

### 34 **Limitations of this study**

35  
36 The findings in this study should be viewed in light of four key  
37 limitations. First, this study was based on a small sample of community  
38 health workers, which may limit the generalizability of the research  
39 findings. Based on the literature about community health services in  
40 China, a multistage, stratified sampling design was employed to ensure  
41 that study data were provincially representative.<sup>7,40</sup> A multistage,  
42 stratified sampling design was used to ensure that study data were  
43 provincially representative. Six sample cities were selected to account for  
44 the variability in regional per capita gross domestic product, and the  
45  
46  
47  
48  
49  
50  
51  
52  
53  
54  
55  
56  
57  
58  
59  
60

1  
2  
3  
4 levels of healthcare development and 15 CHCs in each city were selected  
5  
6 randomly. On average, there are 23 medical technical personnel in a  
7  
8 community health center in Heilongjiang province and there were  
9  
10 approximately 22 health workers in each of the community health centers  
11  
12 in our study. In addition, the proportions of general practitioners, public  
13  
14 health physicians, nurses, and other medical technical personnel in this  
15  
16 study were close to the proportions found in the province as a whole.<sup>3</sup>  
17  
18 Consequently, this sample was representative of Heilongjiang community  
19  
20 health service providers, thereby enhancing the potential for  
21  
22 generalization of the study findings. Second, the instrument for assess the  
23  
24 work stress and work motivation was developed from earlier study and  
25  
26 discussed with experts, while not an international commonly scale. Third,  
27  
28 we used a cross-sectional survey, which may limit our ability to identify  
29  
30 causal relationships between work stress and motivation and job  
31  
32 satisfaction. Fourth, the measurements were conducted by  
33  
34 self-administrated method and respondents' cognition can be affected by  
35  
36 emotions at that point in time. So the common method bias and  
37  
38 self-administrated bias might affect the results.  
39  
40  
41  
42  
43  
44  
45  
46  
47  
48  
49  
50

## 51 **Conclusion**

52  
53  
54 It is important for healthcare managers to improve the job satisfaction of  
55  
56 health workers in low-resource settings. In this study, we examined levels  
57  
58  
59  
60

1  
2  
3  
4 of work stress and motivation according to demographic characteristics  
5  
6 and in respect to levels of job satisfaction; additionally, the key predictors  
7  
8 of job satisfaction were identified using logistic regression analysis. The  
9  
10 results indicated that community health workers rated wages and benefits  
11  
12 highest among five subscales of work stress, and workers' extrinsic  
13  
14 motivation was higher than their intrinsic motivation. The career  
15  
16 development, and wages and benefits subscales of work stress and  
17  
18 financial motivation were significant negative predictors of job  
19  
20 satisfaction, whereas the recognition and responsibility subscales of work  
21  
22 motivation were significant positive determinants.  
23  
24  
25  
26  
27

28  
29 Our findings suggest that there is considerable room for improvement in  
30  
31 the job satisfaction of community health workers in Heilongjiang  
32  
33 Province, and health care managers and policymakers should take both  
34  
35 work stress and work motivation into consideration. First, they should  
36  
37 pay more attention to three types of worker, as these particular groups  
38  
39 reported higher work stress and extrinsic motivation. Second, they should  
40  
41 take a variety of measures to reduce career development, and wage and  
42  
43 benefits stress, as they were negative determinants of job satisfaction.  
44  
45  
46  
47  
48 Third, it is important for managers and policymakers to inspire workers'  
49  
50 intrinsic motivation, as it can have a positive influence on job  
51  
52 satisfaction.  
53  
54  
55  
56  
57  
58  
59  
60

**Table 1 Facets of work stress and work motivation by socio-economic and demographic status for respondents**

|                               |     |      | Work stress        |                    |                    |                         | Work motivation                      |             |                    |                |         |
|-------------------------------|-----|------|--------------------|--------------------|--------------------|-------------------------|--------------------------------------|-------------|--------------------|----------------|---------|
|                               | N   | %    | work task and role | career development | wages and benefits | Workplace relationships | organizational structure and climate | recognition | career development | responsibility | Finance |
| <b>Occupation</b>             |     |      |                    |                    |                    |                         |                                      |             |                    |                |         |
| General practitioner          | 335 | 36.0 | 3.53               | 3.17               | 3.78               | 2.90                    | 3.14                                 | 3.61        | 4.20               | 3.44           | 4.15    |
| Public health physician       | 178 | 19.1 | 3.20               | 2.89               | 3.70               | 2.63                    | 2.96                                 | 3.57        | 4.11               | 3.67           | 4.06    |
| Nurse                         | 267 | 28.8 | 3.24               | 2.95               | 3.54               | 2.76                    | 2.78                                 | 3.53        | 4.05               | 3.39           | 4.01    |
| Other                         | 150 | 16.1 | 3.09               | 2.79               | 3.45               | 2.65                    | 2.84                                 | 3.59        | 4.11               | 3.40           | 4.03    |
| F                             |     |      | 6.91**             | 4.97**             | 3.45**             | 3.05**                  | 6.25**                               | 0.66        | 2.31*              | 1.96           | 0.99    |
| <b>Sex</b>                    |     |      |                    |                    |                    |                         |                                      |             |                    |                |         |
| Male                          | 236 | 25.4 | 3.44               | 3.10               | 3.77               | 2.88                    | 3.12                                 | 3.71        | 4.18               | 3.50           | 4.19    |
| Female                        | 694 | 74.6 | 3.27               | 2.93               | 3.56               | 2.72                    | 2.85                                 | 3.56        | 4.12               | 3.43           | 4.03    |
| F                             |     |      | 2.50*              | 2.27*              | 2.60*              | 2.51*                   | 4.09*                                | 2.36*       | 1.23               | 1.04           | 2.39*   |
| <b>Educational background</b> |     |      |                    |                    |                    |                         |                                      |             |                    |                |         |
| High school or below          | 110 | 11.8 | 3.18               | 2.90               | 3.36               | 2.81                    | 2.72                                 | 3.57        | 4.13               | 3.42           | 4.05    |
| Junior college                | 446 | 48.0 | 3.28               | 2.94               | 3.61               | 2.74                    | 2.86                                 | 3.57        | 4.14               | 3.49           | 4.02    |
| College and above             | 374 | 40.2 | 3.36               | 3.00               | 3.65               | 2.73                    | 3.16                                 | 3.60        | 4.11               | 3.39           | 4.11    |
| F                             |     |      | 2.30               | 0.66               | 4.21*              | 0.45                    | 4.02*                                | 0.13        | 0.24               | 1.53           | 1.33    |
| <b>Age in years</b>           |     |      |                    |                    |                    |                         |                                      |             |                    |                |         |
| <25                           | 78  | 8.4  | 3.08               | 2.81               | 3.45               | 2.60                    | 2.77                                 | 3.80        | 4.23               | 3.60           | 3.92    |
| 25-34                         | 258 | 27.7 | 3.21               | 2.94               | 3.63               | 2.72                    | 2.91                                 | 3.65        | 4.11               | 3.48           | 4.17    |
| 35-44                         | 329 | 35.4 | 3.36               | 2.98               | 3.55               | 2.78                    | 2.88                                 | 3.52        | 4.13               | 3.35           | 4.03    |
| 45-54                         | 234 | 25.2 | 3.43               | 3.02               | 3.69               | 2.79                    | 2.94                                 | 3.53        | 4.13               | 3.51           | 4.04    |
| ≥55                           |     |      |                    |                    |                    |                         |                                      |             |                    |                |         |

|                                 |     |      |        |      |       |       |       |       |      |       |      |
|---------------------------------|-----|------|--------|------|-------|-------|-------|-------|------|-------|------|
| <b>F</b>                        | 31  | 3.3  | 3.12   | 2.88 | 3.54  | 2.71  | 2.93  | 3.48  | 3.98 | 3.28  | 3.91 |
|                                 |     |      | 4.71** | 1.01 | 1.36  | 1.12  | 0.83  | 2.89* | 1.83 | 2.86* | 2.39 |
| <b>Title</b>                    |     |      |        |      |       |       |       |       |      |       |      |
| <b>Senior title</b>             | 42  | 4.5  | 3.12   | 3.11 | 3.38  | 2.69  | 2.73  | 3.37  | 3.97 | 3.55  | 3.96 |
| <b>Vice-senior title</b>        | 131 | 14.1 | 3.32   | 2.92 | 3.65  | 2.63  | 2.93  | 3.46  | 4.05 | 3.25  | 4.03 |
| <b>Middle title</b>             | 399 | 42.9 | 3.43   | 3.03 | 3.69  | 2.85  | 2.94  | 3.56  | 4.16 | 3.44  | 4.06 |
| <b>Primary title</b>            | 299 | 32.2 | 3.20   | 2.93 | 3.54  | 2.72  | 2.87  | 3.62  | 4.12 | 3.49  | 4.08 |
| <b>No title</b>                 | 59  | 6.3  | 3.23   | 2.86 | 3.48  | 2.58  | 2.89  | 3.73  | 4.16 | 3.49  | 4.04 |
| <b>F</b>                        |     |      | 3.96** | 1.07 | 1.71  | 3.04* | 0.59  | 1.73  | 0.98 | 2.13  | 0.16 |
| <b>Monthly income (RMB)</b>     |     |      |        |      |       |       |       |       |      |       |      |
| <b>&lt;2000</b>                 | 361 | 38.9 | 3.24   | 2.95 | 3.69  | 2.76  | 2.90  | 3.61  | 4.15 | 3.49  | 4.09 |
| <b>2000-2999</b>                | 386 | 41.5 | 3.32   | 2.96 | 3.61  | 2.75  | 2.88  | 3.59  | 4.13 | 3.40  | 4.06 |
| <b>3000-3999</b>                | 139 | 14.9 | 3.43   | 2.97 | 3.44  | 2.68  | 2.96  | 3.52  | 4.02 | 3.43  | 3.97 |
| <b>≥4000</b>                    | 44  | 4.7  | 3.39   | 3.03 | 3.21  | 2.93  | 2.78  | 3.44  | 4.27 | 3.53  | 4.28 |
| <b>F</b>                        |     |      | 2.11   | 0.99 | 3.14* | 2.11  | 0.99  | 0.54  | 1.87 | 0.86  | 1.36 |
| <b>Working hours (per week)</b> |     |      |        |      |       |       |       |       |      |       |      |
| <b>&lt;40 小时</b>                | 110 | 11.8 | 3.27   | 2.82 | 3.52  | 2.82  | 2.94  | 2.96  | 4.14 | 3.56  | 3.91 |
| <b>40-47 小时</b>                 | 509 | 54.7 | 3.26   | 2.73 | 3.59  | 2.73  | 2.95  | 2.87  | 4.10 | 3.42  | 4.06 |
| <b>48-55 小时</b>                 | 250 | 26.9 | 3.36   | 2.71 | 3.62  | 2.71  | 2.93  | 2.89  | 4.19 | 3.46  | 4.12 |
| <b>≥56 小时</b>                   | 61  | 6.6  | 3.52   | 2.93 | 3.75  | 2.93  | 3.36  | 3.13  | 4.16 | 3.43  | 4.14 |
| <b>F</b>                        |     |      | 0.06   | 0.20 | 0.48  | 0.20  | 0.01* | 0.11  | 0.39 | 0.44  | 0.13 |

\*p<0.05 \*\*p<0.01



**Table 2 Mean scores of the overall perception and subscales of work stress and work motivation in respect to the level of job satisfaction**

|                                              | Mean $\pm$ SD<br>Total (n=930) | Level of job satisfaction   |                                | P       |
|----------------------------------------------|--------------------------------|-----------------------------|--------------------------------|---------|
|                                              |                                | Satisfied<br>(n=570, 61.3%) | Dissatisfied<br>(n=360, 38.7%) |         |
| <b>Work stress</b>                           |                                |                             |                                |         |
| <b>Overall perception *</b>                  | 3.11 $\pm$ 0.68                | 2.95 $\pm$ 0.68             | 3.37 $\pm$ 0.60                | P=0.000 |
| <b>work task and role¶</b>                   | 3.31 $\pm$ 0.81                | 3.18 $\pm$ 0.82             | 3.52 $\pm$ 0.76                | P=0.000 |
| <b>career development¶</b>                   | 2.96 $\pm$ 0.87                | 2.79 $\pm$ 0.85             | 3.22 $\pm$ 0.83                | P=0.000 |
| <b>Wages and benefits ¶</b>                  | 3.60 $\pm$ 0.95                | 3.38 $\pm$ 0.94             | 3.95 $\pm$ 0.85                | P=0.000 |
| <b>Workplace relationships¶</b>              | 2.75 $\pm$ 0.79                | 2.61 $\pm$ 0.79             | 2.96 $\pm$ 0.74                | P=0.000 |
| <b>organizational structure and climate¶</b> | 2.90 $\pm$ 0.79                | 2.74 $\pm$ 0.79             | 3.15 $\pm$ 0.71                | P=0.000 |
| <b>Work motivation</b>                       |                                |                             |                                |         |
| <b>Overall perception°</b>                   | 3.80 $\pm$ 0.55                | 3.86 $\pm$ 0.55             | 3.70 $\pm$ 0.55                | P=0.000 |
| <b>Career development†</b>                   | 4.13 $\pm$ 0.57                | 4.24 $\pm$ 0.51             | 3.95 $\pm$ 0.62                | P=0.000 |
| <b>Recognition†</b>                          | 3.58 $\pm$ 0.77                | 3.66 $\pm$ 0.77             | 3.45 $\pm$ 0.77                | P=0.000 |
| <b>Responsibility†</b>                       | 3.45 $\pm$ 0.77                | 3.53 $\pm$ 0.77             | 3.32 $\pm$ 0.77                | P=0.000 |
| <b>Financial†</b>                            | 4.06 $\pm$ 0.79                | 4.02 $\pm$ 0.79             | 4.12 $\pm$ 0.80                | P=0.295 |

\* Mean score of overall perception of work stress was calculated for each respondent by adding the value of each item of work stress and then divided by the numbers of all item.

°Mean score of overall perception of work motivation was calculated for each respondent by adding the value of each item of work motivation and then divided by the numbers of the item.

¶Mean score of each subscale of work stress was calculated for each respondent by adding the value of each item belongs to the subscale of work stress and then divided by the numbers of the item.

†Mean score of each subscale of work motivation was calculated for each respondent by adding the value of each item belongs to the subscale of work motivation and then divided by the numbers of the item.

Table 3 The logistic regression analysis for job satisfaction\*

|                                                                    |                                      | Odds Ratio | 95% CI     |
|--------------------------------------------------------------------|--------------------------------------|------------|------------|
| <b>Occupation</b><br>(Reference : nurse)                           | General practitioner                 | 0.56**     | 0.38-0.81  |
|                                                                    | Public health physician              | 0.42*      | 0.20-0.87  |
|                                                                    | Other technical staff                | 1.89*      | 1.04-3.44  |
| <b>Sex</b><br>(Reference :male)                                    | Female                               | 1.27       | 0.83-1.95  |
| <b>Educational background</b><br>(Reference :High school or below) | Junior college                       | 0.76       | 0.43-1.34  |
|                                                                    | College and above                    | 0.75       | 0.41-1.40  |
| <b>Age in years</b><br>(Reference : <25)                           | 25-34                                | 0.60       | 0.30-1.21  |
|                                                                    | 35-44                                | 1.10       | 0.51-2.42  |
|                                                                    | 45-54                                | 1.04       | 0.45-2.35  |
|                                                                    | ≥55                                  | 8.53**     | 1.86-39.01 |
| <b>Title</b><br>(Reference : senior title)                         | Vice-senior title                    | 1.86       | 0.476-7.29 |
|                                                                    | Middle title                         | 2.57       | 0.67-9.78  |
|                                                                    | Primary title                        | 3.84       | 0.96-15.39 |
|                                                                    | No title                             | 7.02*      | 1.53-32.12 |
| <b>Monthly income in RMB</b><br>(Reference : <2000)                | 2000-2999                            | 0.50       | 0.26-0.98  |
|                                                                    | 3000-3999                            | 0.99       | 0.64-1.52  |
|                                                                    | ≥4000                                | 1.30       | 0.86-1.97  |
| <b>Weekly hours worked</b><br>(Reference : <40)                    | 40-47                                | 0.90       | 0.59-1.37  |
|                                                                    | 48-55                                | 1.07       | 0.67-1.70  |
|                                                                    | ≥56                                  | 1.20       | 0.62-2.33  |
| <b>Work stress</b>                                                 | work task and role                   | 0.98       | 0.74-1.300 |
|                                                                    | career development                   | 0.68*      | 0.49-0.94  |
|                                                                    | wages and benefits                   | 0.63**     | 0.50-0.79  |
|                                                                    | Workplace relationships              | 0.80       | 0.59-1.09  |
|                                                                    | Organizational structure and climate | 0.97       | 0.71-1.33  |
| <b>Work motivation</b>                                             | Career development                   | 1.13       | 0.85-1.505 |
|                                                                    | Recognition                          | 2.86**     | 2.02-4.04  |
|                                                                    | Responsibility                       | 1.36*      | 1.02-1.81  |
|                                                                    | Finance                              | 0.72**     | 0.56-0.92  |

\*Strongly satisfied and satisfied coded as 1 vs. strongly dissatisfied and dissatisfied coded as 0.

\*p<0.05, \*\*p<0.01

1  
2  
3 **Acknowledgements** We are thankful to all the community health  
4  
5 workers who participated in the study. We are also grateful to Yin Li,  
6  
7 Xingsan Li, Zhuang Wang and Hongjuan Wei, who have worked closely  
8  
9 with the team to ensure the field survey is successfully implemented.  
10  
11

12  
13 **Completing interests** None.  
14

### 15 **Contributors**

16  
17  
18 LiLi was responsible for the study design, data analysis and the drafting  
19  
20 and revising of the manuscript. HongyanHu and ChangzhiHe, who  
21  
22 contributed equally as the first author to this article, were responsible for  
23  
24 study design, data collection and data analysis. HaoZzhou and ZhongZ  
25  
26 hang provided statistical expertise. XinyanLiu, TaoSun and HengLi  
27  
28 performed data collection and technical support. LihuaFan provided  
29  
30 administrative support. All authors read and approved the final  
31  
32 manuscript.  
33  
34  
35  
36  
37  
38

39 **Funding** This study was funded by the National Science Foundation of  
40  
41 China (NSFC), Contract No.71203050/G0308, Contract No.71073034  
42  
43 and was supported by Young Seed Foundation of Public Health College  
44  
45 of Harbin Medical University. The opinions expressed herein are the  
46  
47 authors' and do not necessarily reflect the views of NSFC and the survey  
48  
49 was conducted independently by researchers from Harbin Medical  
50  
51 University.  
52  
53  
54  
55  
56  
57  
58  
59  
60

## References

1. Starfield B, Shi LY, Macinko J. Contribution of primary care to health systems and health. *Milbank Q* 2005;83: 457–502.
2. Hung LM, Rane S, Tsai J, et al. Advancing primary care to promote equitable health: implications for China. *Int J Equity Health* 2012;11:2.
3. Heilongjiang Provincial Bureau. Heilongjiang Health Statistical Yearbook 2012. Harbin, China: Heilongjiang Provincial Press 2013.
4. State Commission Office for Public Sector Reform. (2006). Notice on Issuing the Instruction Opinions on Organization Structure and Staffing of Urban Community Health Service. Beijing, China. [http://www.gov.cn/zwggk/2006-09/04/content\\_377067.htm](http://www.gov.cn/zwggk/2006-09/04/content_377067.htm) (accessed on 4 September 2006 ).
5. MOH (Ministry of Health of China ) Chinese Health statistics in 2010. Peking Union Medical College Press 2010.
6. MOH (Ministry of Health of China ) (2012) Chinese Health statistics in 2010. Peking Union Medical College Press.
7. Zhou W, Dong YM, Lin XZ, et al. Community health service capacity in China: a survey in three municipalities. *J Eval Clin Pract* 2013;19(1):167–17.
8. Li L, Zhou H, Yao GF, et al. Analysis on working motivation of community health workers in Harbin, China. *Medicine and Society (in Chinese)* 2013;7:40-43.

- 1  
2  
3 9. Clegg A. Occupational stress in nursing: a review of the literature. *J*  
4  
5 *Nurs Manage* 2001; 9:101–106.  
6  
7
- 8  
9 10. Lazarus RS. & Folkman S. *Stress, Appraisal and Coping*. Springer,  
10  
11 New York, NY.1984.  
12
- 13 11. Karasek RA. Job demands, job decision latitude, and mental strain:  
14  
15 implications for job re-design. *Administrative Science Quarterly* 1979;  
16  
17 24(2): 285–308.  
18  
19
- 20 12. Siegrist J. Adverse health effects of high-effort/low-reward conditions.  
21  
22 *J Occup Health Psychol* 1996; 1:27–41.  
23
- 24 13. Nakasis K., Ouzouni C. Factors influencing stress and job satisfaction  
25  
26 of nurses working in psychiatric units: a research review. *Heal Sci J*  
27  
28 2008;2 (4): 183–195.  
29  
30
- 31 14. Jamal M. Burnout among Canadian and Chinese employees: a  
32  
33 cross-cultural study. *European Management Review*  
34  
35 2005;2(3):224–230.  
36  
37
- 38 15. Riggio R. *Introduction to industrial organizational psychology*. New  
39  
40 Jersey: Pearson Education, Inc. 2003.  
41  
42
- 43 16. Cooper CL, Marshall J. Occupational sources of stress: a review of  
44  
45 the literature relating to coronary heart disease and mental ill health. *J*  
46  
47 *Occup Psychol* 1976; 49:11-28.  
48  
49
- 50 17. Kim HJ. Work Stress and Job Satisfaction of Community Mental  
51  
52 Health Nurses in South Korea: A Qualitative Content Analysis. *J*  
53  
54  
55  
56  
57  
58  
59  
60

- 1  
2  
3 Korean Acad Psychiatr Ment Health Nurs 2013;22(4):295-306.  
4  
5  
6 18. Johnson SJ, O'Connor EM, Jacobs S, et al. The relationships among  
7  
8 work stress, strain and self-reported errors in UK community  
9  
10 pharmacy. *Research in Social and Administrative Pharmacy*. 2014;1.  
11  
12  
13 19. Qu NQ, Zhou H, Fan LH, et al. Analysis on work stress and  
14  
15 occupational burnout among community health service staff in Harbin.  
16  
17 *Medicine and Society* 2013;26(9):87-89.  
18  
19  
20  
21 20. Chen XJ, Tan XR, Li LP. Health Problem and Occupational Stress  
22  
23 among Chinese Doctors. *Chinese Medicine* 2013;4: 1-6.  
24  
25  
26 21. Nabirye RC, Brown KC, Pryor ER et al. Occupational stress, job  
27  
28 satisfaction and job performance among hospital nurses in Kampala,  
29  
30 Uganda. *J Nurs Manage* 2011; 19:760–768.  
31  
32  
33  
34 22. Voltmer E, Rosta J, Johannes Siegrist, et al. Job stress and job  
35  
36 satisfaction of physicians in private practice: comparison of German  
37  
38 and Norwegian physicians. *Int Arch Occ Env Hea* 2012;85,  
39  
40 (7):819-828.  
41  
42  
43  
44 23. Saijo Y, Chiba S, Yoshioka E, et al. Job stress and burnout among  
45  
46 urban and rural hospital physicians in Japan. *Aust J Rural Health*  
47  
48 2013;21( 4): 225–231.  
49  
50  
51  
52 24. Sun Y, Luo ZN, Fang PQ. Factors Influencing the Turnover Intention  
53  
54 of Chinese Community Health Service Workers Based on the  
55  
56 Investigation Results of Five Provinces. *J Commun Health*  
57  
58  
59  
60

- 1  
2  
3 2013;38( 6):1058-1066.  
4  
5  
6 25. Franco LM, Bennett S, Kanfer R, et al. Determinants and  
7  
8 consequences of health worker motivation in hospitals in Jordan and  
9  
10 Georgia. Soc Sci Med 2004;58:343-355  
11  
12  
13 26. Kanfer R. Measuring health worker motivation in developing  
14  
15 countries. Partnerships for Health Reform Project, Major Applied  
16  
17 Research Working Paper 1999.  
18  
19  
20  
21 27. Vroom, V. H. Work and motivation. New York: Wiley.1964.  
22  
23  
24 28. Porter LW, Lawler EE. Managerial attitudes and performance.  
25  
26 Homewood, IL: Irwin-Dorsey 1968.  
27  
28  
29 29. Ryan RM, Deci EL. Self-determination theory and the facilitation of  
30  
31 intrinsic motivation, social development, and wellbeing. Am Psychol  
32  
33 2000; 55(1): 68–77.  
34  
35  
36 30. Ryan RM, Deci EL. Self-regulation and the problem of human  
37  
38 autonomy: Does psychology need choice, self-determination, and will?  
39  
40 J Pers 2006; 74(6):1558–1585.  
41  
42  
43 31. Peters DH, Chakraborty S, Mahapatra P, et al. Job satisfaction and  
44  
45 motivation of health workers in public and private sectors:  
46  
47 cross-sectional analysis from two Indian states. Hum  
48  
49 Resour Health. 2010;8:27.  
50  
51  
52  
53  
54 32. Patrick MM, Duane B, Lucy G, et al. Developing a tool to measure  
55  
56 health worker motivation in district hospitals in Kenya. Hum Resour  
57  
58  
59  
60

- 1  
2  
3 Health 2009; 7:40.  
4  
5  
6 33. Wilbroad M, Helen A, Virginia B, et al. Measuring health workers'  
7  
8 motivation in rural health facilities: baseline results from three study  
9  
10 districts in Zambia. *Hum Resour Health* 2013;11:8.  
11  
12  
13 34. Tribolet WC. The relationship between intrinsic and extrinsic  
14  
15 motivation and organizational commitment: a study in a European  
16  
17 environment [D]. Nova Southeastern Univ 2004.  
18  
19  
20  
21 35. Hoonakker PL, Carayon P, McGuire K, et al. Motivation and job  
22  
23 satisfaction of Tele-ICU nurses. *J Crit Care* 2013;28:315.e13  
24  
25 -315.e21.  
26  
27  
28  
29 36. Pool SW. The relationship of job satisfaction with substitutes of  
30  
31 leadership, leadership behavior, and work motivation. *J Psychol*  
32  
33 1997;131(3):271-83.  
34  
35  
36  
37 37. Stringer C, Jeni D, Theivananthampillai. Motivation, pay satisfaction,  
38  
39 and job satisfaction of front-line employees. *Qual Res Acco Man*  
40  
41 2011; 8(2):161-179.  
42  
43  
44 38. Shi L, Hung LM, Song K, et al. Chinese primary care physicians and  
45  
46 work attitudes. *Int J Health Serv* 2013;43(1):167–181.  
47  
48  
49  
50 39. Hung LM, Shi L, Wang H, et al. Chinese primary care providers and  
51  
52 motivating factors on performance. *Fam Prac* 2013; 30:576–586.  
53  
54  
55 40. Ge C, Fu J, Chang Y, et al. Factors associated with job satisfaction  
56  
57 among Chinese community health workers: a cross-sectional study.  
58  
59  
60



- 1  
2  
3 BMC Public Health, 2011;24(11):884.  
4  
5  
6 41. Chen TL, Huang MY, Su TH. Work motivation, work stress, and job  
7  
8 satisfaction in between Taiwan and China-An empirical study. World  
9  
10 Acad Sci, Eng Tech 2012; 68:1446-1450.  
11  
12  
13 42. Ajayi MP., Abimbola OH. Job satisfaction, organizational stress and  
14  
15 employee performance: a study of NAPIMS. Ife Psychol  
16  
17 2013;21:75-82.  
18  
19  
20  
21 43. Wayne SJ, Liden RC. Effects of impression management on  
22  
23 performance ratings: a longitudinal study. Acad Manage J  
24  
25 1995;38:232-260.  
26  
27  
28  
29 44. Gagne M, Deci EL. Self-determination theory and work motivation. J  
30  
31 Organ Behav 2005;26:331-362.  
32  
33  
34 45. Dieleman M, Cuong PV, Anh, LV, et al. Identifying factors for job  
35  
36 motivation of rural health workers in North Vietnam. Hum Resour  
37  
38 Health 2003;1:10.  
39  
40  
41  
42 46. Wanous JP, Reichers AE, Hudy MJ. Overall job satisfaction: how  
43  
44 good are single-item measures? J Appl Psychol 1997;82:247-52.  
45  
46  
47 47. Chen J, Dong JQ, Ding J, Du XP. Analysis on satisfaction of  
48  
49 professionals in community health service institutions held by  
50  
51 different levels of hospital. Chin Gen Pract 2008;4(11): 631-634. (In  
52  
53 Chinese)  
54  
55  
56  
57 48. National Bureau of Statistics. China Statistic Yearbook 2013.  
58  
59  
60

- 1  
2  
3 Beijing ,China: China Sta Press. 2013.
- 4
- 5 49. Ding H, Sun X, Chang WW, et al. A comparison of job satisfaction of  
6  
7  
8  
9  
10  
11  
12  
13  
14  
15  
16  
17  
18  
19  
20  
21  
22  
23  
24  
25  
26  
27  
28  
29  
30  
31  
32  
33  
34  
35  
36  
37  
38  
39  
40  
41  
42  
43  
44  
45  
46  
47  
48  
49  
50  
51  
52  
53  
54  
55  
56  
57  
58  
59  
60
50. Han JF, Li XH. An analysis on the job stressors of community health  
nurses. *Chinese Nursing Management*. 2007;7(5):45-48. (in Chinese )
51. Hou ZH, Meng QY, Yuan BB et al. Motivation preferences of general  
practices in rural China. *Chinese Journal of Health Policy*,  
2010;13(10):18-22.
52. Lephalala RP. Factors influencing nurses job satisfaction in selected  
private hospitals in England. *Curationis* 2008;31(3): 60–69.
53. Becchetti L, Castriota S, Tortia EC. Productivity, wages and intrinsic  
motivations. *Sma Bus Eco* 2012;41:379–399.
54. Frey BS. On the relationship between intrinsic and extrinsic work  
motivation. *Int J Ind Organ* 1997;15(4),427-439.
55. Qu JW. Investigation and research on job stress and degree of loyalty  
in community health workers in Liaoning Province (M). Shenyang:  
Chinese Medical University 2013.
56. Malik AA, Yamamoto SS, Souares A, et al. Motivational  
determinants among physicians in Lahore Pakistan. *BMC Health Serv  
Res* 2010;10:201.

1  
2  
3  
4  
5  
6  
7  
8  
9  
10  
11  
12  
13  
14  
15  
16  
17  
18  
19  
20  
21  
22  
23  
24  
25  
26  
27  
28  
29  
30  
31  
32  
33  
34  
35  
36  
37  
38  
39  
40  
41  
42  
43  
44  
45  
46  
47  
48  
49  
50  
51  
52  
53  
54  
55  
56  
57  
58  
59  
60

57. David PH, Srinika DJ. Gender differences in work stress among clinical social workers. J Soc Serv Res 2008;10:18.

For peer review only

STROBE Statement—Checklist of items that should be included in reports of *cross-sectional studies*

|                              | Item No | Recommendation                                                                                                                                                                                                                                                                                                                             | Reported on page # |
|------------------------------|---------|--------------------------------------------------------------------------------------------------------------------------------------------------------------------------------------------------------------------------------------------------------------------------------------------------------------------------------------------|--------------------|
| <b>Title and abstract</b>    | 1       | (a) Indicate the study's design with a commonly used term in the title or the abstract                                                                                                                                                                                                                                                     | 2, 7               |
|                              |         | (b) Provide in the abstract an informative and balanced summary of what was done and what was found                                                                                                                                                                                                                                        | 2                  |
| <b>Introduction</b>          |         |                                                                                                                                                                                                                                                                                                                                            |                    |
| Background/rationale         | 2       | Explain the scientific background and rationale for the investigation being reported                                                                                                                                                                                                                                                       | 4, 5               |
| Objectives                   | 3       | State specific objectives, including any prespecified hypotheses                                                                                                                                                                                                                                                                           | 9                  |
| <b>Methods</b>               |         |                                                                                                                                                                                                                                                                                                                                            |                    |
| Study design                 | 4       | Present key elements of study design early in the paper                                                                                                                                                                                                                                                                                    | 9                  |
| Setting                      | 5       | Describe the setting, locations, and relevant dates, including periods of recruitment, exposure, follow-up, and data collection                                                                                                                                                                                                            | 10                 |
| Participants                 | 6       | (a) Give the eligibility criteria, and the sources and methods of selection of participants                                                                                                                                                                                                                                                | 10, 11             |
| Variables                    | 7       | Clearly define all outcomes, exposures, predictors, potential confounders, and effect modifiers. Give diagnostic criteria, if applicable                                                                                                                                                                                                   | 11-13              |
| Data sources/<br>measurement | 8*      | For each variable of interest, give sources of data and details of methods of assessment (measurement). Describe comparability of assessment methods if there is more than one group                                                                                                                                                       |                    |
| Bias                         | 9       | Describe any efforts to address potential sources of bias                                                                                                                                                                                                                                                                                  | 10                 |
| Study size                   | 10      | Explain how the study size was arrived at                                                                                                                                                                                                                                                                                                  | 10                 |
| Quantitative variables       | 11      | Explain how quantitative variables were handled in the analyses. If applicable, describe which groupings were chosen and why                                                                                                                                                                                                               | 10, 11             |
| Statistical methods          | 12      | (a) Describe all statistical methods, including those used to control for confounding<br>(b) Describe any methods used to examine subgroups and interactions<br>(c) Explain how missing data were addressed<br>(d) If applicable, describe analytical methods taking account of sampling strategy<br>(e) Describe any sensitivity analyses | 13, 14             |
| <b>Results</b>               |         |                                                                                                                                                                                                                                                                                                                                            |                    |
| Participants                 | 13*     | (a) Report numbers of individuals at each stage of study—eg numbers potentially eligible, examined for eligibility, confirmed eligible, included in the study, completing follow-up, and analysed<br>(b) Give reasons for non-participation at each stage<br>(c) Consider use of a flow diagram                                            |                    |
| Descriptive data             | 14*     | (a) Give characteristics of study participants (eg demographic, clinical, social) and information on exposures and potential confounders<br>(b) Indicate number of participants with missing data for each variable of interest                                                                                                            |                    |
| Outcome data                 | 15*     | Report numbers of outcome events or summary measures                                                                                                                                                                                                                                                                                       |                    |

|    |                          |    |                                                                         |
|----|--------------------------|----|-------------------------------------------------------------------------|
| 1  |                          |    |                                                                         |
| 2  | Main results             | 16 | (a) Give unadjusted estimates and, if applicable, confounder-           |
| 3  |                          |    | adjusted estimates and their precision (eg, 95% confidence              |
| 4  |                          |    | interval). Make clear which confounders were adjusted for and why       |
| 5  |                          |    | they were included                                                      |
| 6  |                          |    |                                                                         |
| 7  |                          |    | (b) Report category boundaries when continuous variables were           |
| 8  |                          |    | categorized                                                             |
| 9  |                          |    |                                                                         |
| 10 |                          |    | (c) If relevant, consider translating estimates of relative risk into   |
| 11 |                          |    | absolute risk for a meaningful time period                              |
| 12 | Other analyses           | 17 | Report other analyses done—eg analyses of subgroups and                 |
| 13 |                          |    | interactions, and sensitivity analyses                                  |
| 14 |                          |    |                                                                         |
| 15 | <b>Discussion</b>        |    |                                                                         |
| 16 | Key results              | 18 | Summarise key results with reference to study objectives                |
| 17 | Limitations              | 19 | Discuss limitations of the study, taking into account sources of        |
| 18 |                          |    | potential bias or imprecision. Discuss both direction and magnitude     |
| 19 |                          |    | of any potential bias                                                   |
| 20 | Interpretation           | 20 | Give a cautious overall interpretation of results considering           |
| 21 |                          |    | objectives, limitations, multiplicity of analyses, results from similar |
| 22 |                          |    | studies, and other relevant evidence                                    |
| 23 |                          |    |                                                                         |
| 24 | Generalisability         | 21 | Discuss the generalisability (external validity) of the study results   |
| 25 |                          |    |                                                                         |
| 26 | <b>Other information</b> |    |                                                                         |
| 27 | Funding                  | 22 | Give the source of funding and the role of the funders for the          |
| 28 |                          |    | present study and, if applicable, for the original study on which the   |
| 29 |                          |    | present article is based                                                |
| 30 |                          |    |                                                                         |

\*Give information separately for exposed and unexposed groups.

**Note:** An Explanation and Elaboration article discusses each checklist item and gives methodological background and published examples of transparent reporting. The STROBE checklist is best used in conjunction with this article (freely available on the Web sites of PLoS Medicine at <http://www.plosmedicine.org/>, Annals of Internal Medicine at <http://www.annals.org/>, and Epidemiology at <http://www.epidem.com/>). Information on the STROBE Initiative is available at [www.strobe-statement.org](http://www.strobe-statement.org).
